# Supplementary material for: Reproductive patterns, pregnancy outcomes and parental leave practices of women physicians in Ontario, Canada: the Dr Mom Cohort Study protocol
Source: PubMed Central journal article supplement — BMJ Open. 2020 Oct 21;10(10):e041281. doi: 10.1136/bmjopen-2020-041281 (PMC7580071; doi:10.1136/bmjopen-2020-041281), 2020-10-21
Supplement: bmjopen-2020-041281.draft_revisions.pdf [file bmjopen-2020-041281.draft_revisions.pdf]

# BMJ Open

BMJ Open is committed to open peer review. As part of this commitment we make the peer review history of every article we publish publicly available.

When an article is published we post the peer reviewers' comments and the authors' responses online. We also post the versions of the paper that were used during peer review. These are the versions that the peer review comments apply to.

The versions of the paper that follow are the versions that were submitted during the peer review process. They are not the versions of record or the final published versions. They should not be cited or distributed as the published version of this manuscript.

BMJ Open is an open access journal and the full, final, typeset and author-corrected version of record of the manuscript is available on our site with no access controls, subscription charges or pay-per-view fees (<http://bmjopen.bmj.com>).

If you have any questions on BMJ Open's open peer review process please email [info.bmjopen@bmj.com](mailto:info.bmjopen@bmj.com)

# BMJ Open

## Reproductive patterns, pregnancy outcomes, and parental leave practices of women physicians in Ontario, Canada: the Dr. Mom Cohort Study protocol

|                               |                                                                                                                                                                                                                                                                                                                                                                                                                                                                                                           |
|-------------------------------|-----------------------------------------------------------------------------------------------------------------------------------------------------------------------------------------------------------------------------------------------------------------------------------------------------------------------------------------------------------------------------------------------------------------------------------------------------------------------------------------------------------|
| Journal:                      | <i>BMJ Open</i>                                                                                                                                                                                                                                                                                                                                                                                                                                                                                           |
| Manuscript ID                 | bmjopen-2020-041281                                                                                                                                                                                                                                                                                                                                                                                                                                                                                       |
| Article Type:                 | Protocol                                                                                                                                                                                                                                                                                                                                                                                                                                                                                                  |
| Date Submitted by the Author: | 03-Jun-2020                                                                                                                                                                                                                                                                                                                                                                                                                                                                                               |
| Complete List of Authors:     | Cusimano, Maria; University of Toronto, Obstetrics & Gynaecology<br>Baxter, Nancy; The University of Melbourne School of Population and Global Health<br>Sutradhar, Rinku; Institute for Clinical Evaluative Sciences,<br>Ray, Joel; St Michael's Hospital<br>Garg, Amit; University of Western Ontario<br>McArthur, Eric; Institute for Clinical Evaluative Sciences<br>Vigod, Simone; University of Toronto,<br>Simpson, Andrea; St Michael's Hospital; University of Toronto, Obstetrics & Gynaecology |
| Keywords:                     | EPIDEMIOLOGY, OBSTETRICS, Maternal medicine < OBSTETRICS, GENERAL MEDICINE (see Internal Medicine), MEDICAL EDUCATION & TRAINING, SURGERY                                                                                                                                                                                                                                                                                                                                                                 |
|                               |                                                                                                                                                                                                                                                                                                                                                                                                                                                                                                           |

SCHOLARONE™  
Manuscripts

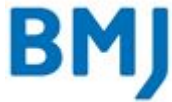

I, the Submitting Author has the right to grant and does grant on behalf of all authors of the Work (as defined in the below author licence), an exclusive licence and/or a non-exclusive licence for contributions from authors who are: i) UK Crown employees; ii) where BMJ has agreed a CC-BY licence shall apply, and/or iii) in accordance with the terms applicable for US Federal Government officers or employees acting as part of their official duties; on a worldwide, perpetual, irrevocable, royalty-free basis to BMJ Publishing Group Ltd ("BMJ") its licensees and where the relevant Journal is co-owned by BMJ to the co-owners of the Journal, to publish the Work in this journal and any other BMJ products and to exploit all rights, as set out in our [licence](#).

The Submitting Author accepts and understands that any supply made under these terms is made by BMJ to the Submitting Author unless you are acting as an employee on behalf of your employer or a postgraduate student of an affiliated institution which is paying any applicable article publishing charge ("APC") for Open Access articles. Where the Submitting Author wishes to make the Work available on an Open Access basis (and intends to pay the relevant APC), the terms of reuse of such Open Access shall be governed by a Creative Commons licence – details of these licences and which [Creative Commons](#) licence will apply to this Work are set out in our licence referred to above.

Other than as permitted in any relevant BMJ Author's Self Archiving Policies, I confirm this Work has not been accepted for publication elsewhere, is not being considered for publication elsewhere and does not duplicate material already published. I confirm all authors consent to publication of this Work and authorise the granting of this licence.

1  
2  
3 **1 Reproductive patterns, pregnancy outcomes, and parental leave practices of women**  
4  
5 **2 physicians in Ontario, Canada: the Dr. Mom Cohort Study protocol**  
6

7  
8 3 Maria C. Cusimano, MD<sup>1,2</sup>; Nancy N. Baxter, MD PhD<sup>2-4</sup>; Rinku Sutradhar, PhD<sup>4,5</sup>; Joel G. Ray,  
9  
10 4 MD MSc<sup>4,6</sup>; Amit X. Garg MD PhD<sup>4,7</sup>; Eric McArthur, MSc<sup>4</sup>; Simone Vigod, MD MSc<sup>4,8,9</sup>;  
11  
12 5 Andrea N. Simpson, MD MSc<sup>1,2,10</sup>  
13

14  
15  
16  
17 **7 Author Affiliations**  
18

- 19 8 [1] Department of Obstetrics & Gynaecology, University of Toronto, Toronto, ON, Canada  
20  
21 9 [2] Li Ka Shing Knowledge Institute, St. Michael's Hospital, Toronto, ON, Canada  
22  
23 10 [3] Melbourne School of Population and Global Health, University of Melbourne, Melbourne  
24  
25 11 VIC, Australia  
26  
27 12 [4] ICES (formerly the Institute for Clinical Evaluative Sciences), ON, Canada  
28  
29 13 [5] Division of Biostatistics, Dalla Lana School of Public Health, University of Toronto,  
30  
31 14 Toronto, ON, Canada  
32  
33 15 [6] Department of Medicine, St. Michael's Hospital, Toronto, ON, Canada  
34  
35 16 [7] Department of Medicine, London Health Sciences Centre, London, ON, Canada  
36  
37 17 [8] Department of Psychiatry, Women's College Hospital, Toronto, ON, Canada  
38  
39 18 [9] Women's College Research Institute, Women's College Hospital, Toronto, ON, Canada  
40  
41 19 [10] Department of Obstetrics & Gynaecology, St. Michael's Hospital/Unity Health Toronto,  
42  
43 20 Toronto, ON, Canada  
44  
45  
46  
47  
48

49  
50  
51 **22 Corresponding Author:** Dr. Andrea N. Simpson | 507-55 Queen St E, Toronto, Ontario, M5C  
52  
53 23 1R6 | T: (416) 867-7480 | <Andrea.Simpson@unityhealth.to>  
54  
55  
56  
57  
58  
59  
60

1  
2  
3 24 **ABSTRACT**  
4  
5

6 25 **Introduction:** Surveys and qualitative studies suggest that women physicians may delay  
7  
8 26 childbearing, be at increased risk of adverse peripartum complications when they do become  
9  
10 27 pregnant, and face discrimination and lower earnings as a result of parenthood. Observational  
11  
12 28 studies enrolling large, representative samples of women physicians are needed to accurately  
13  
14 29 evaluate their reproductive patterns, pregnancy outcomes, parental leave practices, and  
15  
16 30 earnings. This protocol provides a detailed research plan for such studies.  
17  
18  
19

20 31 **Methods & Analysis:** All practicing physicians in Ontario, Canada, are registered with the  
21  
22 32 College of Physicians and Surgeons of Ontario (CPSO). By linking a dataset of physicians from  
23  
24 33 the CPSO to existing provincial administrative databases, which hold health data and physician  
25  
26 34 billing records, we will be able to assess the reproductive healthcare utilization, work practices,  
27  
28 35 and pregnancy outcomes of women physicians at the population-level. Specific outcomes of  
29  
30 36 interest include: (1) rates and timing of pregnancy; (2) pregnancy-related care and complications;  
31  
32 37 and (3) duration of parental leave and subsequent earnings.  
33  
34  
35  
36

37 38 **Ethics & Dissemination:** This protocol has been approved by the Research Ethics Board at St.  
38  
39 39 Michael's Hospital in Toronto, Ontario, Canada (#18-248). We will disseminate findings through  
40  
41 40 several peer-reviewed publications, presentations at national and international meetings, and  
42  
43 41 engagement of physicians, residency programs, department heads, and medical societies.  
44  
45  
46

47 42 **Keywords:** Epidemiology; Obstetrics; Maternal Medicine; General Medicine; Medical  
48  
49 43 Education & Training; Surgery  
50  
51

52 44 **Word Count:** Abstract 206; Body 3,936  
53  
54  
55  
56  
57  
58  
59  
60

## 45 STRENGTHS & LIMITATIONS OF THIS STUDY

- 46 • The observational studies proposed will be the largest to date of women physicians who  
47 have experienced pregnancy and childbirth.
- 48 • Linkage of the physician cohort to population-based administrative health databases will  
49 enable accurate ascertainment of occupational factors such as work intensity that may be  
50 associated with pregnancy outcomes.
- 51 • Due to the inherent limitations of such databases, we will be unable to account for  
52 sociodemographic factors such as relationship status and specific intentions with respect  
53 to pregnancy, family planning, and work leave practices. We will also be unable to  
54 determine the education level or occupation of non-physician controls.
- 55 • This study will be conducted in Ontario, Canada, and may not be generalizable to  
56 jurisdictions with major differences in medical training.

## 58 INTRODUCTION

59 Despite a marked increase in the number of women entering medicine over the last  
60 50 years (1, 2), the challenges associated with becoming pregnant and having children during  
61 training or clinical practice have been minimally addressed (3). Evidence from qualitative studies  
62 and surveys of women physicians raise concerns that pregnancy and motherhood may jeopardize  
63 career advancement, reduce job and fellowship opportunities, negatively impact referral patterns,  
64 and result in resentment from colleagues who may feel hampered with a greater workload (3-10).  
65 Inconsistent institutional support for pregnant women and parents, and the reality that physician  
66 mothers usually bear a disproportionate burden of home and parenting obligations compared to  
67 physician fathers, may exacerbate these problems (11-16). In part because of these issues, it is  
68 thought that women physicians may delay childbearing, have fewer children, or even remain  
69 childless more often than men physicians and non-physician women (3, 17-21). However,  
70 epidemiologic studies investigating such hypotheses are lacking.

71 Once pregnant, the demands faced by physicians may predispose them to an increased  
72 risk of adverse outcomes. Prolonged hours, shift/night work, and exposure to infectious agents  
73 and radiation have been described as potential risk factors for pregnancy complications (22-25).  
74 Advanced maternal age, due to delayed childbearing, is associated with subfertility as well as  
75 increased risks of pregnancy complications including hypertensive disorders, fetal growth  
76 restriction, placental abruption, preterm delivery, and stillbirth, among others (26).

77 Existing studies comparing pregnancy outcomes in physicians and non-physicians are  
78 almost exclusively survey-based and findings vary widely (Table 1). Some studies demonstrate  
79 that physicians have increased risks of certain adverse pregnancy outcomes, such as hypertensive  
80 disorders and threatened preterm labour (27-32), while others find no such relationship (33, 34).

1  
2  
3 81 In the only registry-based study published to date, physician occupation was not associated with  
4  
5 82 preterm labour, low birth weight, or perinatal death compared to women with other white-collar  
6  
7 83 jobs, but differences across specialties, trainee status, or work intensity were not investigated  
8  
9  
10 84 (34). Since an association between the nature of physicians' work and adverse pregnancy  
11  
12 85 outcomes is biologically plausible, additional high-quality studies are needed.

13  
14  
15 86 Women physicians face many challenges after pregnancy, and the literature is limited  
16  
17 87 in this area as well. Although many cross-sectional surveys have identified barriers to obtaining  
18  
19 88 adequate maternity leave and managing clinical loads around delivery and return to work (5, 12,  
20  
21 89 35-37), few studies have systematically described the practice patterns of physician mothers (16).  
22  
23 90 The impact of childbirth and parental leave on the subsequent earnings of women physicians is  
24  
25 91 also unclear. In one survey, over half of physician mothers reported losing \$10,000 or more in  
26  
27 92 income due to leave (7). In other fields, a motherhood earnings penalty beyond the gender pay  
28  
29 93 gap has been noted (38, 39). Although qualitative studies and surveys have underscored a  
30  
31 94 possibly similar phenomenon in physicians (5-7), observational research is required.

32  
33  
34  
35 95

## 36 37 96 **SPECIFIC AIMS**

38  
39  
40 97 In the proposed studies, we will harness unique data resources available in Ontario,  
41  
42 98 Canada, to address unanswered questions in this field. We will first develop a representative  
43  
44 99 cohort of Ontario physicians by linking physician registration data to existing provincial health  
45  
46  
47 100 administrative data. We will then conduct analyses within specific subgroups of this larger  
48  
49 101 cohort (Figure 1) to address the following objectives:

- 50  
51 102 1) Compare reproductive patterns between women physicians and non-physicians, and  
52  
53  
54 103 determine if physician work characteristics are associated with rates of pregnancy  
55  
56  
57  
58  
59



- 1  
2  
3 104 2) Compare pregnancy outcomes and processes of obstetrical care between women  
4  
5 105 physicians and non-physicians, and determine if physician work characteristics are  
6  
7 106 associated with adverse pregnancy outcomes  
8  
9  
10 107 3) Describe the pregnancy and postpartum work practices of women physicians, and  
11  
12 108 determine the impact of childbirth on subsequent practice patterns and earnings  
13  
14  
15 109

## 17 110 **METHODS & ANALYSIS**

### 19 111 **Cohort development**

#### 21 112 *Rationale & Overview*

23  
24 113 Existing studies examining issues around pregnancy in physicians are almost entirely  
25  
26 114 self-report surveys with moderate response rates and small sample sizes, susceptible to selection  
27  
28 115 and misclassification bias. We will address this limitation by developing and studying a cohort of  
29  
30 116 practicing physicians registered with the College of Physicians and Surgeons of Ontario (CPSO),  
31  
32 117 linked to existing Ontario population-based administrative databases.  
33  
34  
35 118

#### 37 119 *Data Sources*

##### 40 120 *CPSO Database*

42 121 The CPSO is the body that regulates the practice of medicine in Ontario. Physicians are  
43  
44 122 required to be members of the CPSO to practice medicine in the province. The CPSO also has a  
45  
46 123 legislated mandate to continuously improve the quality of care provided by physicians, by  
47  
48 124 maintaining standards of medical practice through peer assessment and remediation.  
49  
50

51 125 To do this, the CPSO maintains a database of all physicians who have registered to  
52  
53 126 practice medicine in Ontario. We obtained a dataset of physicians who registered with the CPSO  
54  
55  
56  
57  
58  
59  
60

1  
2  
3 127 from January 1, 1990 to November 26, 2018 (Supplemental Table 1). This dataset has variables  
4  
5 128 on physicians' registration status, medical school, year of graduation, practice location, and  
6  
7 129 specialty, collected at one or two possible time points: (1) the date of physicians' initial  
8  
9  
10 130 registration, and/or (2) the most recent data query.

11  
12 131 Physicians of all age and genders in the CPSO dataset were probabilistically linked to  
13  
14 132 existing provincial administrative databases using physicians' given name, surname, gender, and  
15  
16 133 date of birth. Subsets of this larger linked cohort will be used to address each aim (Figure 1). The  
17  
18 134 linkage of the CPSO dataset to existing Ontario administrative databases enables assessment of  
19  
20 135 physicians' health service utilization and health outcomes.  
21  
22  
23

#### 24 136 25 26 137 *Ontario Administrative Databases*

27  
28 138 All provincial administrative databases (Supplemental Table 2) required to establish the  
29  
30 139 cohorts, exposures, outcomes, and covariates specific to each aim are held at ICES, a non-profit  
31  
32 140 research institute authorized to collect and use health data on Ontario residents for the purposes  
33  
34 141 of health system evaluation and improvement. Collection and compilation of health records at  
35  
36 142 ICES is possible because Ontario residents have universal access to physician services and  
37  
38 143 hospital-based care through the Ontario Health Insurance Plan (OHIP). ICES databases  
39  
40 144 are linked using unique OHIP numbers that are assigned to each individual.  
41  
42  
43

44 145 Demographic data will be identified from several ICES databases. Vital statistics and  
45  
46 146 postal code of residence, used to derive rurality and area-level income quintile from Canadian  
47  
48 147 census data, will be obtained from the Registered Persons Database (RPDB). Immigration status  
49  
50 148 will be obtained from the Ontario portion of Immigration, Refugees, and Citizenship Canada's  
51  
52  
53 149 Permanent Resident Database. Marginalization, another area-level measure of socioeconomic  
54  
55  
56  
57  
58  
59  
60

1  
2  
3 150 status based on residential instability, material deprivation, dependency, and ethnic  
4  
5 151 concentration, will be obtained from the Ontario Marginalization Index.  
6

7  
8 152 Comorbidities will be ascertained from the Canadian Institute for Health Information  
9  
10 153 (CIHI) Discharge Abstract Database (DAD), which holds diagnostic/procedural information on  
11  
12 154 inpatient hospital stays since 1988; the Same Day Surgery (SDS) database, which holds records  
13  
14 155 for same day procedures since 1991; the National Ambulatory Care Reporting System (NACRS),  
15  
16 156 which holds records on emergency department visits since 2000; and the OHIP database, which  
17  
18 157 holds physician billing claims for health services since 1991. Several Ontario-specific registries  
19  
20 158 and ICES-derived cohorts, including the Ontario Cancer Registry, Ontario Diabetes Dataset,  
21  
22 159 and Ontario Hypertension Dataset, can also be used identify specific medical conditions.  
23  
24

25  
26 160 Childbirths and other recognized pregnancies (e.g. spontaneous abortions, ectopic  
27  
28 161 pregnancies) will be identified from the ICES-derived Mother-Baby Dataset (MOMBABY),  
29  
30 162 which links the CIHI records of delivering mothers and their newborns; the Better Outcomes  
31  
32 163 Registry and Network (BORN), Ontario's perinatal registry including data from fertility clinics,  
33  
34 164 specialized antenatal clinics, hospitals, midwifery practice groups, and both prenatal & newborn  
35  
36 165 screening laboratories; as well as the DAD, SDS, OHIP, and NACRS databases (Supplemental  
37  
38 166 Table 2-3). Adverse pregnancy-related and mental health outcomes will be obtained from these  
39  
40 167 same databases and as the Ontario Mental Health Reporting System (OMHRS) database, which  
41  
42 168 holds data on patients in adult designated inpatient mental health beds. Prenatal, antepartum,  
43  
44 169 intrapartum, and postpartum health service utilization, including assisted reproductive  
45  
46 170 technology, will be obtained from the OHIP, DAD/SDS, and BORN databases.  
47  
48  
49

50  
51 171 The work practices and earnings of Ontario physicians will be obtained from the OHIP  
52  
53 172 database; 95% of specialists and 50% of primary care physicians receive their income from fee-  
54  
55  
56  
57  
58  
59  
60

1  
2  
3 173 for-service (FFS) billings, and all Ontario physicians are required to submit shadow billings for  
4  
5 174 non-FFS services. The frequency and timing of physicians' billing claims for health services and  
6  
7 175 surgical procedures will be used to establish measures of work intensity such as overnight work,  
8  
9 176 and evening and weekend shiftwork, before, during, and after pregnancy. Physician earnings will  
10  
11 177 be derived from total OHIP billings. Practice model for family physicians will be obtained from  
12  
13 178 the Client Agency Program Enrolment (CAPE) database. Specialty, trainee status, and practice  
14  
15 179 location, will be obtained from the CPSO dataset and the ICES-derived Physician Database  
16  
17 180 (IPDB), which contains updated yearly information about physicians in Ontario.  
18  
19  
20  
21  
22  
23

181

### 182 ***Study Populations & Exposure Assessment***

24  
25  
26 183 Study populations will depend on the aim (Figure 1). Aim 1 will include Ontario  
27  
28 184 women of reproductive age (15-50 years). Aim 2 will include Ontario women of reproductive  
29  
30 185 age who have had at least one childbirth  $\geq 20$  weeks gestational age (GA). In both Aims 1 and 2,  
31  
32 186 physician occupation will be the main exposure of interest; we will compare women physicians  
33  
34 187 (exposed) to non-physicians (comparator). Physicians will be selected from the CPSO dataset.  
35  
36 188 Non-physicians will be selected from the RPDB, and randomly assigned a simulated CPSO  
37  
38 189 registration date based on the distribution of registration dates in physicians.  
39  
40  
41

42 190 Aim 3 will include women and men physicians of reproductive age. Childbirth  $\geq 20$   
43  
44 191 weeks GA will be the main exposure of interest; we will compare women physicians who have  
45  
46 192 had at least one childbirth (exposed) to: (1) women physicians who have had no childbirths, and  
47  
48 193 (2) men physicians (comparator). Comparator physicians will be randomly assigned a simulated  
49  
50 194 date of childbirth based on the distribution of childbirth dates in women physicians.  
51  
52  
53

195

## 196 ***Covariates***

197 We will examine several covariates in physicians and non-physicians. Demographic  
198 factors will include age, year of cohort entry, income quintile, and immigration status. Clinical  
199 factors will include comorbidities, use of assisted reproductive technology, number of previous  
200 livebirths, and number of previous recognized pregnancies. We will group comorbidities into  
201 Aggregated Diagnosis Groups (ADGs) on the basis of similarity, chronicity, disability, and  
202 likelihood of requiring specialty care using the Johns Hopkins ACG® System (40).

203 We will also examine several covariates in physicians only. Trainee status, specialty,  
204 practice model, practice location, and measures of work intensity (e.g. weekend and overnight  
205 shifts, time spent operating) will be ascertained according to methodology described below and  
206 in previous work (41-43).

## 208 ***Anticipated Challenges & Mitigation Strategies***

### 209 *Variable Follow-Up*

210 Physicians are a highly mobile population; 34% of Canadian medical graduates move  
211 outside of their home province for residency training (44), and 30% of Canadian physicians in  
212 independent practice obtained their medical degree internationally (1). We therefore anticipate  
213 that some physicians will have lived in Ontario for their entire reproductive lifespans (complete  
214 look-back), while others may have left Ontario periodically or arrived for the first time after  
215 medical school graduation (incomplete look-back).

216 Physicians with incomplete look-back prior to their CPSO registration may have  
217 insufficient data available to obtain study variables that rely on a historical period, particularly  
218 to ascertain previous pregnancies, thus introducing potential for misclassification. For example,

1  
2  
3 219 a 32-year-old American physician with one prior childbirth moving to Ontario to practice would  
4  
5 220 have no record of that birth in ICES databases. To mitigate this, we will truncate the look-back  
6  
7 221 of non-physicians to mirror that of matched physicians so that they undergo an identical  
8  
9  
10 222 process of ascertaining covariates. This will facilitate appropriate comparison.  
11

12 223

### 14 224 *Determining Transition to Independent Practice*

16  
17 225 The CPSO database contains one variable describing the type of license (e.g.  
18  
19 226 postgraduate education, independent practice, etc.) held by physicians at the time of their initial  
20  
21 227 registration with the CPSO (Supplemental Table 1). Preliminary analyses demonstrate that 90%  
22  
23 228 of reproductive-age physicians first registered as residents/fellows on a postgraduate education  
24  
25 229 license. However, the CPSO database does not hold information on license changes, or when  
26  
27 230 physicians transition from postgraduate education to independent practice.  
28  
29

30  
31 231 To mitigate this, we plan to use OHIP data to identify the transition from training to  
32  
33 232 practice. Physicians with a postgraduate education license receive a salary from the provincial  
34  
35 233 Ministry of Health and Long-Term Care, while physicians with an independent practice license  
36  
37 234 receive an income by submitting billings to OHIP. We will use physicians' initiation of billings  
38  
39 235 in OHIP as indicator of their transition from training to practice.  
40  
41

42 236

### 44 237 *Determining Physician Specialty*

46  
47 238 The CPSO database contains two variables describing the specialty of physicians  
48  
49 239 (Supplemental Table 1): one is collected at initial registration with the CPSO, and the other is  
50  
51 240 collected at the most recent data query. Specialty is not formally assigned until after physicians  
52  
53 241 finish residency training and are certified for practice by either the Royal College of Physicians  
54  
55  
56  
57  
58  
59  
60

242 and Surgeons of Canada or the College of Family Physicians of Canada, despite the fact that  
243 they have been working in that specialty for several years.

244 We will therefore assign specialty from the CPSO database based on information  
245 available at the time of either initial registration or the most recent data query. For physicians  
246 lacking specialty information, we will use linkages to IPDB and OHIP. If specialty information  
247 remains missing after searching all three data sources (CPSO, IPDB, OHIP) and the physician  
248 was a recent graduate from medical school ( $\leq 5$  years), then such physicians be deemed active  
249 residents with specialty not yet determined.

250

## 251 **Aim 1: Compare reproductive patterns in women physicians and non-physicians**

### 252 *Rationale & Overview*

253 Numerous survey-based studies suggest that women physicians frequently delay  
254 childbearing and subsequently experience a higher rate of infertility compared to the general  
255 population (3, 17-20). This has been quantified in only one retrospective cohort study assessing  
256 birth trends among Taiwanese female physicians (21), which demonstrated that maternal age at  
257 delivery was up to four years later in physicians than non-physicians. Further studies are needed  
258 to characterize the timing and factors impacting pregnancy in physicians.

259

### 260 *Analysis Plan*

261 We will evaluate reproductive patterns among Ontario women physicians and non-  
262 physicians of reproductive age (15-50 years). We will use MOMBABY to ascertain childbirth,  
263 and NACRS, OHIP, and CIHI-DAD to identify other recognized pregnancies. Unmatched time-  
264 to-event analyses will be performed to compare rates of childbirth between physicians and the

1  
2  
3 265 general population, and matched or adjusted time-to-event analyses will be used to evaluate the  
4  
5 266 independent association of physician occupation with rates of childbirth. We will also examine  
6  
7 267 secondary outcomes such as number of childbirths, number of recognized pregnancies, and  
8  
9 268 maternal age at childbirth, among physicians and non-physicians.

12 269 We also aim to determine whether specific work-related factors faced by physicians  
13  
14 270 impact their reproductive patterns and rates of childbirth. Adjusted time-to-event and Poisson  
15  
16 271 regression models will be constructed in women physicians only to evaluate whether variables  
17  
18 272 such as specialty, trainee status, and frequency of overnight work are associated rates of  
19  
20 273 childbirth and other secondary outcomes respectively.  
21  
22 274

## 26 275 **Aim 2: Compare adverse pregnancy outcomes in women physicians and non-physicians**

### 28 276 *Rationale & Overview*

31 277 It is unclear how work as a physician and related characteristics such as night shifts  
32  
33 278 and working hours impact obstetrical outcomes. A recent systematic review demonstrated that  
34  
35 279 pregnant women who work shifts or longer hours have increased odds of preterm birth and other  
36  
37 280 adverse outcomes, but all included studies were at substantial risk of bias, and only one pertained  
38  
39 281 specifically to physicians (25). Surveys of residents show an association between increased work  
40  
41 282 intensity and adverse outcomes, but exposures were obtained by recall and defined inconsistently  
42  
43 283 across studies (27, 31, 45). We will be able to reliably establish work characteristics prior to and  
44  
45 284 during pregnancy from OHIP, and thus provide unique insight into the association between  
46  
47 285 physician occupation and adverse pregnancy outcomes.  
48  
49 286

### 54 287 *Outcomes*



1  
2  
3 288 We will evaluate adverse pregnancy outcomes among Ontario women physicians and  
4  
5 289 non-physicians of reproductive age who have experienced at least one childbirth  $\geq 20$  weeks GA.  
6  
7  
8 290 All outcomes of interest were chosen for their clinical relevance and established methodology for  
9  
10 291 ascertainment from ICES databases such as MOMBABY, DAD, and OHIP, using standard  
11  
12 292 diagnostic and procedural codes (46-54) (Supplemental Table 3).

13  
14 293 Perinatal outcomes include: preterm birth (delivery at  $< 37$  weeks GA); low birthweight;  
15  
16 294 stillbirth; neonatal intensive care unit (NICU) admission; and neonatal death at  $< 28$  days of life.  
17  
18  
19 295 Maternal outcomes include: severe maternal morbidity (a composite endpoint of potentially life-  
20  
21 296 threatening complications occurring during the index pregnancy) (48); maternal death (from 20  
22  
23 297 weeks GA to  $\leq 42$  days postpartum); new onset hypertensive disorders in the index pregnancy;  
24  
25 298 other obstetric (e.g. premature rupture of membranes) and non-obstetric complications (e.g.  
26  
27 299 peripartum mood disorders); and processes of obstetrical care (e.g. antenatal care, labour  
30  
31 300 induction, mode of delivery, epidural).

32  
33 301

### 34 35 302 ***Analysis Plan***

36  
37 303 Unmatched logistic regression will be performed to compare each adverse pregnancy  
38  
39 304 outcome specified above between physicians and the general population. Matched or adjusted  
40  
41 305 logistic regression analyses, accounting for demographic and clinical covariates as described  
42  
43 306 above, will be performed to isolate the independent association of physician occupation with  
44  
45 307 adverse pregnancy outcomes. We also aim to determine whether specific work-related factors  
46  
47 308 faced by physicians influence their pregnancy outcomes. Adjusted logistic regression models  
48  
49 309 will be constructed in women physicians only to evaluate whether variables such as specialty,  
50  
51 310 trainee status, and overnight work are associated with adverse pregnancy outcomes. For all  
52  
53  
54  
55  
56  
57  
58  
59  
60

1  
2  
3 311 analyses described, we will also consider use of log-binomial or modified Poisson  
4  
5 312 regression models to determine risk ratios directly.  
6  
7  
8 313

9  
10 314 **Aim 3: Compare practice patterns and earnings of women physicians experiencing**  
11  
12 315 **childbirth to non-parent physicians**  
13

14 316 ***Rationale & Overview***

15  
16  
17 317 Although the challenges faced by both medical trainees and practicing physicians in  
18  
19 318 taking parental leave have been documented in the literature (5, 12, 35-37), the work and leave  
20  
21 319 practices of physician mothers in Canada are unknown. The financial implications of pregnancy  
22  
23 320 and childbirth on physician earnings are also unclear. Whether a “motherhood earnings penalty”  
24  
25 321 exists for physicians (38, 39) remains unclear but would be of significant concern to physicians  
26  
27 322 practicing in Canada, the majority of whom are self-employed. We aim to describe the parental  
28  
29 323 leave patterns and earnings of Ontario physicians using a rigorous observational design.  
30  
31  
32

33 324  
34  
35 325 ***Analysis Plan***

36  
37 326 We will evaluate practice patterns and earnings of men and women physicians in Ontario  
38  
39 327 of reproductive age. We will hard-match women physicians who have had at least one childbirth  
40  
41 328 to women physicians who have had no childbirths, and to men physicians, on their specialty and  
42  
43 329 year of graduation from medical school. Physicians who have delivered will enter the study on  
44  
45 330 their obstetrical delivery date, and physicians who have not delivered will be assigned a  
46  
47 331 corresponding referent date.  
48  
49  
50

51 332 In women physicians who have delivered, we will examine: (1) length of leave, defined  
52  
53 333 by the absence of OHIP billings adjacent to the delivery date; and (2) timing of leave, defined in  
54  
55  
56  
57  
58  
59  
60

1  
2  
3 334 relation to the delivery date. In all physicians, we will examine: (1) work intensity, defined as  
4  
5 335 mentioned previously through evaluation of measures such as overnight call practices and  
6  
7  
8 336 operating time; (4) earnings, as defined by OHIP billings.  
9

10 337 We will compare earnings across three distinct 2-year periods: (1) pre-pregnancy, (2)  
11  
12 338 peripartum; and (3) post-pregnancy. We will first perform a within-patient analysis pertaining to  
13  
14 339 delivering women physicians only, in order to assess how their earnings vary with pregnancy and  
15  
16 340 childbirth. Earnings from all three time periods will be compared using regression methods for  
17  
18 341 cost data (e.g. Poisson, negative binomial, gamma models); the specific model will be  
19  
20 342 determined based on the distribution of earnings for the cohort.  
21  
22  
23

24 343 We will then perform a comparative analysis of (a) delivering women physicians to non-  
25  
26 344 delivering women physicians, and (b) delivering women physicians to men physicians. Earnings  
27  
28 345 from the pre-pregnancy and post-pregnancy time periods, or dummy time periods in controls,  
29  
30 346 will again be evaluated with appropriate regression methods for cost data.  
31  
32

33 347

### 34 348 **Sample Size and Power**

35  
36  
37 349 The CPSO dataset should have adequate power for all proposed analyses. To  
38  
39 350 demonstrate this, we have calculated the power of our study to find differences in adverse  
40  
41 351 pregnancy outcomes, specifically preterm birth, between women physicians and non-physicians  
42  
43 352 (Specific Aim 2). Preterm birth is a major determinant of neonatal morbidity/mortality, and has  
44  
45 353 significant long-term health consequences. Even a small increased risk of preterm birth would  
46  
47 354 be of importance to women physicians.  
48  
49

50  
51 355 If a conservative 5,000 physicians have at least one pregnancy during the study period,  
52  
53 356 are compared to at least 25,000 non-physicians, and we assume a baseline preterm birth rate of  
54  
55  
56  
57  
58  
59  
60

1  
2  
3 357 7.7 per 100 births (55) and an alpha of 0.05, we will have 80% power to detect a relative risk of  
4  
5 358 1.16 or greater, and 90% power to detect a relative risk of 1.19 or greater.  
6  
7  
8 359

## 9 10 360 **Patient and Public Involvement**

11  
12 361 The public were not involved in the design of this study. The proposed research questions  
13  
14 362 aim to address issues of importance to physician health; the study team accordingly includes  
15  
16  
17 363 women physicians and physician parents.  
18  
19 364

## 20 21 365 **SIGNIFICANCE**

22  
23  
24 366 The linkage of physician information to population-based data on pregnancy presents a  
25  
26 367 unique opportunity to evaluate physicians' reproductive patterns and perinatal health outcomes  
27  
28 368 in a manner that addresses the limitations of previous studies. Ontario's fee-for-service system  
29  
30  
31 369 allows accurate ascertainment of physician work intensity and other work-related factors that  
32  
33 370 may affect rates of reproduction and adverse pregnancy outcomes.  
34

35 371 This work is needed; reproductive patterns and childbearing have not been rigorously  
36  
37 372 studied in physicians, despite many barriers to pregnancy and risk factors for adverse outcomes  
38  
39 373 inherent in their work. We will determine if physicians are at increased risk of adverse pregnancy  
40  
41 374 outcomes compared to the general population, and clarify whether this risk is mediated by age or  
42  
43 375 other occupational hazards. Understanding issues around pregnancy and leave, which may affect  
44  
45 376 up to half of the physician workforce at some point during their careers, also has implications for  
46  
47 377 the functioning of the healthcare system.  
48  
49  
50

51 378

## 52 53 379 **ETHICS & DISSEMINATION**

1  
2  
3 380 This protocol was approved by the Research Ethics Board at St. Michael's Hospital  
4  
5 381 (#18-248) and by the ICES Privacy & Legal Office. ICES is a prescribed entity under section 45  
6  
7 382 of Ontario's Personal Health Information Protection Act. Section 45 authorizes ICES to collect  
8  
9 383 personal health information without consent for analyses related to the evaluation of, allocation  
10  
11 384 of resources to, or planning for all or part of the health system. In accordance with ICES policy,  
12  
13 385 we will suppress all cells with <6 individuals to prevent re-identification. All research outputs  
14  
15 386 related to this work will undergo a re-identification risk assessment prior to submission.  
16  
17  
18

19 387 Translation of the findings of our study into practices and policies will require  
20  
21 388 engagement of physicians, physician leaders, and organizational bodies. The team of researchers  
22  
23 389 includes clinician-investigators in obstetrics, surgery, medicine, and psychiatry who will provide  
24  
25 390 important contextual information to the dissemination of our findings. We will engage bodies  
26  
27 391 such as the Society of Obstetricians and Gynaecologists of Canada (SOGC), the Canadian  
28  
29 392 Medical Association (CMA), and residency programs and department heads.  
30  
31  
32

33 393 We anticipate that our findings will be presented at local and national conferences, and  
34  
35 394 result in several peer-reviewed publications. Our findings should impact physicians, physicians-  
36  
37 395 in-training, medical educators, residency program directors, department chairs, and hospitals and  
38  
39 396 organizations where physicians work.  
40  
41  
42  
43  
44  
45  
46  
47  
48  
49  
50  
51  
52  
53  
54  
55  
56  
57  
58  
59  
60

1  
2  
3 398 **ACKNOWLEDGEMENTS**  
4

5 399 The authors thank Drs. Peter Tanuseputro, Dr. Manish Sood and Emily Rhodes, Research  
6  
7 400 Assistant in Clinical Epidemiology at the Ottawa Hospital Research Institute, for their assistance  
8  
9  
10 401 with data acquisition.  
11

12 402

13  
14 403 **FUNDING STATEMENT**  
15

16  
17 404 This study will be conducted with grant funding from Physicians' Services Incorporated  
18  
19 405 (PSI) Foundation. This study is also supported by ICES, which is funded by an annual grant from  
20  
21 406 the Ontario Ministry of Health and Long-Term Care (MOHLTC). The opinions, results, analytic  
22  
23 407 plans, and conclusions reported in this paper are those of the authors and are independent of the  
24  
25 408 funding sources. No endorsement by ICES or the Ontario MOHLTC is intended or should be  
26  
27 409 inferred. Dr. Maria Cusimano is supported by the American College of Surgeons Resident  
28  
29 410 Research Scholarship and the Canadian Institutes of Health Research (CIHR) Vanier  
30  
31 411 Canada Graduate Scholarship.  
32

33 412

34  
35 413 **AUTHOR CONTRIBUTIONS**  
36  
37

38 414 All authors contributed to the design of this study. NNB, AXG, and ANS participated in  
39  
40 415 data acquisition. MCC, NNB, RS, JGR, EM, and ANS developed the analytic plan. MCC, NNB,  
41  
42 416 and ANS obtained ethics approval for this work. MCC and ANS prepared the first draft of the  
43  
44 417 manuscript. All authors contributed to and approved the final version of the manuscript.  
45  
46

47 418

48  
49 419 **COMPETING INTERESTS STATEMENT**  
50  
51

52 420 The authors have no conflicts of interest to disclose.  
53  
54  
55  
56  
57  
58  
59  
60

## REFERENCES

1. CIHI. Physicians in Canada: Canadian Institute for Health Information; 2018 [Available from: <https://www.cihi.ca/en/physicians-in-canada>].
2. AAMC. Physician Specialty Data Report: Association of American Medical Colleges; 2018 [Available from: <https://www.aamc.org/download/492910/data/2018executivesummary.pdf>].
3. Turner PL, Lumpkins K, Gabre J, Lin MJ, Liu X, Terrin M. Pregnancy among women surgeons: trends over time. *Arch Surg*. 2012;147(5):474-9.
4. Tamburrino MB, Evans CL, Campbell NB, Franco KN, Jurs SG, Pentz JE. Physician pregnancy: male and female colleagues' attitudes. *J Am Med Womens Assoc* (1972). 1992;47(3):82-4.
5. Halley MC, Rustagi AS, Torres JS, Linos E, Plaut V, Mangurian C, et al. Physician mothers' experience of workplace discrimination: a qualitative analysis. *BMJ*. 2018;363:k4926.
6. Adesoye T, Mangurian C, Choo EK, Girgis C, Sabry-Elnaggar H, Linos E, et al. Perceived Discrimination Experienced by Physician Mothers and Desired Workplace Changes: A Cross-sectional Survey. *JAMA Intern Med*. 2017;177(7):1033-6.
7. Scully RE, Davids JS, Melnitchouk N. Impact of Procedural Specialty on Maternity Leave and Career Satisfaction Among Female Physicians. *Ann Surg*. 2017;266(2):210-7.
8. Krause ML, Elrashidi MY, Halvorsen AJ, McDonald FS, Oxentenko AS. Impact of Pregnancy and Gender on Internal Medicine Resident Evaluations: A Retrospective Cohort Study. *J Gen Intern Med*. 2017;32(6):648-53.
9. Kin C, Yang R, Desai P, Mueller C, Girod S. Female trainees believe that having children will negatively impact their careers: results of a quantitative survey of trainees at an academic medical center. *BMC Med Educ*. 2018;18(1):260.
10. Willett LL, Wellons MF, Hartig JR, Roenigk L, Panda M, Dearing AT, et al. Do women residents delay childbearing due to perceived career threats? *Acad Med*. 2010;85(4):640-6.
11. Humphries LS, Lyon S, Garza R, Butz DR, Lemelman B, Park JE. Parental leave policies in graduate medical education: A systematic review. *Am J Surg*. 2017;214(4):634-9.
12. Phillips SP, Richardson B, Lent B. Medical faculty's views and experiences of parental leave: a collaborative study by the Gender Issues Committee, Council of Ontario Faculties of Medicine. *J Am Med Womens Assoc* (1972). 2000;55(1):23-6.
13. MacVane CZ, Fix ML, Strout TD, Zimmerman KD, Bloch RB, Hein CL. Congratulations, You're Pregnant! Now About Your Shifts . . . : The State of Maternity Leave Attitudes and Culture in EM. *West J Emerg Med*. 2017;18(5):800-10.
14. Hutchinson AM, Anderson NS, 3rd, Gochnour GL, Stewart C. Pregnancy and childbirth during family medicine residency training. *Fam Med*. 2011;43(3):160-5.
15. Jolly S, Griffith KA, DeCastro R, Stewart A, Ubel P, Jagsi R. Gender differences in time spent on parenting and domestic responsibilities by high-achieving young physician-researchers. *Ann Intern Med*. 2014;160(5):344-53.
16. Ly DP, Seabury SA, Jena AB. Hours Worked Among US Dual Physician Couples With Children, 2000 to 2015. *JAMA Intern Med*. 2017;177(10):1524-5.
17. Aghajanova L, Hoffman J, Mok-Lin E, Herndon CN. Obstetrics and Gynecology Residency and Fertility Needs. *Reprod Sci*. 2017;24(3):428-34.

18. Troppmann KM, Palis BE, Goodnight JE, Jr., Ho HS, Troppmann C. Women surgeons in the new millennium. *Arch Surg.* 2009;144(7):635-42.
19. Stentz NC, Griffith KA, Perkins E, Jones RD, Jagsi R. Fertility and Childbearing Among American Female Physicians. *J Womens Health (Larchmt).* 2016;25(10):1059-65.
20. Bering J, Pflibsen L, Eno C, Radhakrishnan P. Deferred Personal Life Decisions of Women Physicians. *J Womens Health (Larchmt).* 2018;27(5):584-9.
21. Wang YJ, Chiang SC, Chen TJ, Chou LF, Hwang SJ, Liu JY. Birth Trends among Female Physicians in Taiwan: A Nationwide Survey from 1996 to 2013. *Int J Environ Res Public Health.* 2017;14(7).
22. Katz VL, Miller NH, Bowes WA, Jr. Pregnancy complications of physicians. *West J Med.* 1988;149(6):704-7.
23. Palmer KT, Bonzini M, Harris EC, Linaker C, Bonde JP. Work activities and risk of prematurity, low birth weight and pre-eclampsia: an updated review with meta-analysis. *Occup Environ Med.* 2013;70(4):213-22.
24. Stocker LJ, Macklon NS, Cheong YC, Bewley SJ. Influence of shift work on early reproductive outcomes: a systematic review and meta-analysis. *Obstet Gynecol.* 2014;124(1):99-110.
25. Cai C, Vandermeer B, Khurana R, Nerenberg K, Featherstone R, Sebastiani M, et al. The impact of occupational shift work and working hours during pregnancy on health outcomes: a systematic review and meta-analysis. *Am J Obstet Gynecol.* 2019.
26. Lean SC, Derricott H, Jones RL, Heazell AEP. Advanced maternal age and adverse pregnancy outcomes: A systematic review and meta-analysis. *PLoS One.* 2017;12(10):e0186287.
27. Klebanoff MA, Shiono PH, Rhoads GG. Outcomes of pregnancy in a national sample of resident physicians. *N Engl J Med.* 1990;323(15):1040-5.
28. Osborn LM, Harris DL, Reading JC, Prather MB. Outcome of pregnancies experienced during residency. *J Fam Pract.* 1990;31(6):618-22.
29. Pinhas-Hamiel O, Rotstein Z, Achiron A, Gabbay U, Achiron R, Barak Y, et al. Pregnancy during residency--an Israeli survey of women physicians. *Health Care Women Int.* 1999;20(1):63-70.
30. Gabbe SG, Morgan MA, Power ML, Schulkin J, Williams SB. Duty hours and pregnancy outcome among residents in obstetrics and gynecology. *Obstet Gynecol.* 2003;102(5 Pt 1):948-51.
31. Behbehani S, Tulandi T. Obstetrical complications in pregnant medical and surgical residents. *J Obstet Gynaecol Can.* 2015;37(1):25-31.
32. Miller NH, Katz VL, Cefalo RC. Pregnancies among physicians. A historical cohort study. *J Reprod Med.* 1989;34(10):790-6.
33. Heinonen S, Saarikoski S. Reproductive risk factors, pregnancy characteristics and obstetric outcome in female doctors. *BJOG.* 2002;109(3):261-4.
34. Quansah R, Gissler M, Jaakkola JJ. Work as a physician and adverse pregnancy outcomes: a Finnish nationwide population-based registry study. *Eur J Epidemiol.* 2009;24(9):531-6.
35. Rangel EL, Castillo-Angeles M, Changala M, Haider AH, Doherty GM, Smink DS. Perspectives of pregnancy and motherhood among general surgery residents: A qualitative analysis. *Am J Surg.* 2018;216(4):754-9.
36. Rangel EL, Smink DS, Castillo-Angeles M, Kwakye G, Changala M, Haider AH, et al. Pregnancy and Motherhood During Surgical Training. *JAMA Surg.* 2018;153(7):644-52.



37. Mohan H, Ali O, Gokani V, McGoldrick C, Smitham P, Fitzgerald JEF, et al. Surgical trainees' experience of pregnancy, maternity and paternity leave: a cross-sectional study. *Postgrad Med J*. 2019.
38. Budig MJ EP. The wage penalty for motherhood. *Am Sociol Rev*. 2001;66:204-25.
39. Budig MJ HM. Differences in disadvantage: Variation in the motherhood penalty across white women's earnings distribution. *Am Sociol Rev*. 2010;75:705-28.
40. Austin PC, van Walraven C, Wodchis WP, Newman A, Anderson GM. Using the Johns Hopkins Aggregated Diagnosis Groups (ADGs) to predict mortality in a general adult population cohort in Ontario, Canada. *Med Care*. 2011;49(10):932-9.
41. Govindarajan A, Urbach DR, Kumar M, Li Q, Murray BJ, Juurlink D, et al. Outcomes of Daytime Procedures Performed by Attending Surgeons after Night Work. *N Engl J Med*. 2015;373(9):845-53.
42. Redelmeier DA, Thiruchelvam D, Daneman N. Introducing a methodology for estimating duration of surgery in health services research. *J Clin Epidemiol*. 2008;61(9):882-9.
43. Dossa F, Simpson AN, Sutradhar R, Urbach DR, Tomlinson G, Detsky AS, et al. Sex-Based Disparities in the Hourly Earnings of Surgeons in the Fee-for-Service System in Ontario, Canada. *JAMA Surg*. 2019.
44. CaRMS. R-1 Data and Reports Ottawa, Ontario: Canadian Resident Matching Service; 2019 [Available from: <https://www.carms.ca/data-reports/r1-data-reports/>].
45. Takeuchi M, Rahman M, Ishiguro A, Nomura K. Long working hours and pregnancy complications: women physicians survey in Japan. *BMC Pregnancy Childbirth*. 2014;14:245.
46. Ray JG, Vermeulen MJ, Schull MJ, Redelmeier DA. Cardiovascular health after maternal placental syndromes (CHAMPS): population-based retrospective cohort study. *Lancet*. 2005;366(9499):1797-803.
47. Joseph KS, Liu S, Rouleau J, Kirby RS, Kramer MS, Sauve R, et al. Severe maternal morbidity in Canada, 2003 to 2007: surveillance using routine hospitalization data and ICD-10CA codes. *J Obstet Gynaecol Can*. 2010;32(9):837-46.
48. Ray JG, Park AL, Dzakpasu S, Dayan N, Deb-Rinker P, Luo W, et al. Prevalence of Severe Maternal Morbidity and Factors Associated With Maternal Mortality in Ontario, Canada. *JAMA Netw Open*. 2018;1(7):e184571.
49. Garg AX, Nevis IF, McArthur E, Sontrop JM, Koval JJ, Lam NN, et al. Gestational hypertension and preeclampsia in living kidney donors. *N Engl J Med*. 2015;372(2):124-33.
50. Wanigaratne S, Shakya Y, Gagnon AJ, Cole DC, Rashid M, Blake J, et al. Refugee maternal and perinatal health in Ontario, Canada: a retrospective population-based study. *BMJ Open*. 2018;8(4):e018979.
51. Ray JG, Park AL, Fell DB. Mortality in Infants Affected by Preterm Birth and Severe Small-for-Gestational Age Birth Weight. *Pediatrics*. 2017;140(6).
52. Bartsch E, Park AL, Jairam J, Ray JG. Concomitant preterm birth and severe small-for-gestational age birth weight among infants of immigrant mothers in Ontario originating from the Philippines and East Asia: a population-based study. *BMJ Open*. 2017;7(7):e015386.
53. Polachek IS, Fung K, Vigod SN. First lifetime psychiatric admission in the postpartum period: A population-based comparison to women with prior psychiatric admission. *Gen Hosp Psychiatry*. 2016;40:25-32.
54. Barker LC, Kurdyak P, Fung K, Matheson FI, Vigod S. Postpartum psychiatric emergency visits: a nested case-control study. *Arch Womens Ment Health*. 2016;19(6):1019-27.

1  
2  
3 55. Trends in Canadian births: 1993 to 2013: Statistics Canada; [Available from:  
4 <https://www150.statcan.gc.ca/n1/pub/82-625-x/2016001/article/14673-eng.htm>.  
5  
6  
7  
8  
9  
10  
11  
12  
13  
14  
15  
16  
17  
18  
19  
20  
21  
22  
23  
24  
25  
26  
27  
28  
29  
30  
31  
32  
33  
34  
35  
36  
37  
38  
39  
40  
41  
42  
43  
44  
45  
46  
47  
48  
49  
50  
51  
52  
53  
54  
55  
56  
57  
58  
59  
60

For peer review only

**TABLES**

**Table 1.** Published studies of adverse pregnancy outcomes comparing physicians vs. non-physicians (1989 to 2019).

| Study                          | Region  | Exposed                   | Comparator                             | Response rate (%) | Relative direction of the outcome (exposed vs. comparator) |               |     |                |               |            |
|--------------------------------|---------|---------------------------|----------------------------------------|-------------------|------------------------------------------------------------|---------------|-----|----------------|---------------|------------|
|                                |         |                           |                                        |                   | SA                                                         | HTN disorders | SGA | Preterm labour | Preterm birth | Stillbirth |
| <b>Cross-sectional surveys</b> |         |                           |                                        |                   |                                                            |               |     |                |               |            |
| Klebanoff, 1990 (27)           | USA     | Women residents (N=989)   | Partners of male residents (N=1239)    | 86                | ↔                                                          | ↑             | ↔   | ↑              | ↔             | ↔          |
| Osborn, 1990 (28)              | USA     | Women residents (N=92)    | Partners of male residents (N=144)     | 57                | ↔                                                          | ↔             | NR  | ↑              | ↔             | ↔          |
| Pinhas-Hamiel, 1999 (29)       | Israel  | Women physicians (N=207)  | General population (NR)                | 52                | ↔                                                          | ↔             | NR  | NR             | ↑             | ↑          |
| Gabbe, 2003(30)                | USA     | Women residents (N=302)   | Partners of male residents (N=274)     | 96                | NR                                                         | ↑             | ↑   | ↑              | NR            | ↔          |
| Behbehani, 2015 (31)           | Canada  | Women residents (N=238)   | General population (N=3767)            | NR                | ↑                                                          | ↑             | ↑   | ↔              | NR            | NR         |
| <b>Cohort studies</b>          |         |                           |                                        |                   |                                                            |               |     |                |               |            |
| Miller, 1989 (32)              | USA     | Women physicians (N=67)   | General population (N=201)             | NA                | NR                                                         | NR            | NR  | ↑              | ↑             | NR         |
| Heinonen, 2002 (33)            | Finland | Women physicians (N=331)  | General population (N=21,997)          | NA                | NR                                                         | ↓             | ↔   | NR             | ↔             | ↔          |
| Quansah, 2009 (34)             | Finland | Women physicians (N=7642) | Upper white collar workers (N=124,606) | NA                | NR                                                         | NR            | ↔   | NR             | ↔             | ↔          |

Abbreviations: NA (not applicable); NR (not reported); SA (spontaneous abortion); HTN (hypertensive); SGA (small for gestational age birthweight); ↔ no significant difference; ↑ increased risk; ↓ decreased risk

1  
2  
3 **FIGURE LEGENDS**  
4  
5  
6  
7

8 **Figure 1.** Overview of specific research aims, with study populations (including exposed and  
9 comparator groups) and study outcomes.  
10  
11  
12  
13  
14  
15  
16  
17  
18  
19  
20  
21  
22  
23  
24  
25  
26  
27  
28  
29  
30  
31  
32  
33  
34  
35  
36  
37  
38  
39  
40  
41  
42  
43  
44  
45  
46  
47  
48  
49  
50  
51  
52  
53  
54  
55  
56  
57  
58  
59  
60

For peer review only

1  
2  
3  
4  
5  
6  
7  
8  
9  
10  
11  
12  
13  
14  
15  
16  
17  
18  
19  
20  
21  
22  
23  
24  
25  
26  
27  
28  
29  
30  
31  
32  
33  
34  
35  
36  
37  
38  
39  
40  
41

### Aim 1: Reproductive Patterns

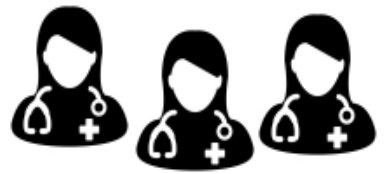

**Exposed:** Women physicians of reproductive age

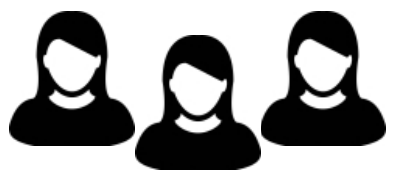

**Comparator:** Non-physicians of reproductive age

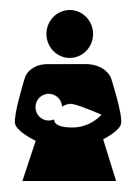

**Primary Outcome:**  
- Childbirth  $\geq 20$  weeks GA

### Aim 2: Adverse Pregnancy Outcomes

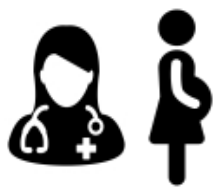

**Exposed:** Women physicians with childbirth  $\geq 20$  weeks GA

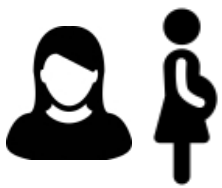

**Comparator:** Non-physicians with childbirth  $\geq 20$  weeks GA

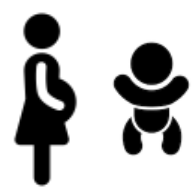

**Perinatal Outcomes** (e.g. preterm birth)

**Maternal Outcomes** (e.g. severe maternal morbidity)

### Aim 3: Practice Patterns & Earnings

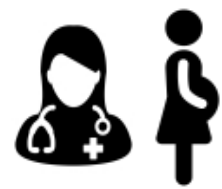

**Exposed:** Women physicians with childbirth  $\geq 20$  weeks GA

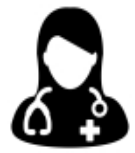

**Comparator 1:**  
Women physicians without childbirth

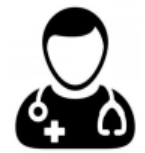

**Comparator 2:**  
Men physicians

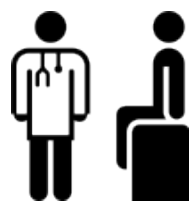

**Primary Outcomes:**  
- Practice patterns  
- Earnings

1  
2  
3 **SUPPLEMENTAL INFORMATION**  
4  
5  
6

7  
8 **Supplemental Table 1.** Variable list from the College of Physicians & Surgeons of Ontario  
9

10  
11  
12 **Supplemental Table 2.** Datasets from CPSO and ICES for use in proposed research studies  
13  
14

15  
16  
17 **Supplemental Table 3.** Perinatal and maternal adverse pregnancy outcomes  
18  
19  
20  
21  
22  
23  
24  
25  
26  
27  
28  
29  
30  
31  
32  
33  
34  
35  
36  
37  
38  
39  
40  
41  
42  
43  
44  
45  
46  
47  
48  
49  
50  
51  
52  
53  
54  
55  
56  
57  
58  
59  
60

**Supplemental Table 1.** Variable list from the College of Physicians & Surgeons of Ontario

| <b>Reported Fields</b>                              | <b>Field Description</b>                                                                                                                                                                                                                                                                                                                                                                                                                                                                                                                                                                                                                                                                                                                                                                                                                                                                                                                                                                                                                                                                   |
|-----------------------------------------------------|--------------------------------------------------------------------------------------------------------------------------------------------------------------------------------------------------------------------------------------------------------------------------------------------------------------------------------------------------------------------------------------------------------------------------------------------------------------------------------------------------------------------------------------------------------------------------------------------------------------------------------------------------------------------------------------------------------------------------------------------------------------------------------------------------------------------------------------------------------------------------------------------------------------------------------------------------------------------------------------------------------------------------------------------------------------------------------------------|
| CPSO #                                              | CPSO license number and unique identifier                                                                                                                                                                                                                                                                                                                                                                                                                                                                                                                                                                                                                                                                                                                                                                                                                                                                                                                                                                                                                                                  |
| First name                                          | First and middle names                                                                                                                                                                                                                                                                                                                                                                                                                                                                                                                                                                                                                                                                                                                                                                                                                                                                                                                                                                                                                                                                     |
| Last name                                           | Surname                                                                                                                                                                                                                                                                                                                                                                                                                                                                                                                                                                                                                                                                                                                                                                                                                                                                                                                                                                                                                                                                                    |
| Gender                                              | Male or female designation provided by member upon application for license                                                                                                                                                                                                                                                                                                                                                                                                                                                                                                                                                                                                                                                                                                                                                                                                                                                                                                                                                                                                                 |
| Registration status (current status)                | Membership status with the CPSO (current as of query date): <ul style="list-style-type: none"> <li>i. Active</li> <li>ii. Expire</li> <li>iii. Suspended</li> <li>iv. Revoked</li> </ul>                                                                                                                                                                                                                                                                                                                                                                                                                                                                                                                                                                                                                                                                                                                                                                                                                                                                                                   |
| Registration class (status at time of registration) | Type of license member held at time of registration: <ul style="list-style-type: none"> <li>i. Independent Practice (IP) – Permits independent practice in the areas of medicine in which the physician is educated and experienced.</li> <li>ii. Postgraduate Education (PG) – Permits supervised practice after graduation from medical school, and is required for postgraduate (residency) medical training at an Ontario medical school.</li> <li>iii. Restricted (R) – Must practice in accordance with the specific terms and conditions imposed on the certificate.</li> <li>iv. Academic Practice (AP) – May practice only in the medical school department in which the physician holds an academic appointment.</li> <li>v. NOT INCLUDED: Academic Visitor (AV) – May practice only in the medical school department in which the physician holds an academic appointment.</li> <li>vi. NOT INCLUDED: Short Duration (SD) – May practice only to the extent required by the short duration appointment at a public hospital, psychiatric facility or medical school.</li> </ul> |
| First ever registration date                        | Date of initial registration with the CPSO (YYMMDD)                                                                                                                                                                                                                                                                                                                                                                                                                                                                                                                                                                                                                                                                                                                                                                                                                                                                                                                                                                                                                                        |
| Medical school                                      | School where member obtained undergraduate medical degree                                                                                                                                                                                                                                                                                                                                                                                                                                                                                                                                                                                                                                                                                                                                                                                                                                                                                                                                                                                                                                  |
| Graduation year                                     | Year the member graduated from undergraduate medical school                                                                                                                                                                                                                                                                                                                                                                                                                                                                                                                                                                                                                                                                                                                                                                                                                                                                                                                                                                                                                                |
| Practice address type                               | Self-reported information that describes either: <ul style="list-style-type: none"> <li>i. Primary Practice – Main practice location</li> <li>ii. Secondary Practice – Alternative practice location(s)</li> </ul>                                                                                                                                                                                                                                                                                                                                                                                                                                                                                                                                                                                                                                                                                                                                                                                                                                                                         |
| Practice address                                    | Member's primary and secondary practice addresses (first practice address available on file; if no address available, leave blank)                                                                                                                                                                                                                                                                                                                                                                                                                                                                                                                                                                                                                                                                                                                                                                                                                                                                                                                                                         |
| Practice city                                       | City or municipality of member's primary and secondary practice address                                                                                                                                                                                                                                                                                                                                                                                                                                                                                                                                                                                                                                                                                                                                                                                                                                                                                                                                                                                                                    |
| Practice province                                   | Province of member's primary and secondary practice addresses                                                                                                                                                                                                                                                                                                                                                                                                                                                                                                                                                                                                                                                                                                                                                                                                                                                                                                                                                                                                                              |
| Practice postal code                                | Postal code of member's primary and secondary practice addresses                                                                                                                                                                                                                                                                                                                                                                                                                                                                                                                                                                                                                                                                                                                                                                                                                                                                                                                                                                                                                           |
| Specialty type                                      | Specialty designation certified by one of the following: <ul style="list-style-type: none"> <li>i. Royal College of Physicians and Surgeons of Canada</li> <li>ii. College of Family Physicians Canada</li> <li>iii. College of Physicians and Surgeons of Ontario</li> </ul>                                                                                                                                                                                                                                                                                                                                                                                                                                                                                                                                                                                                                                                                                                                                                                                                              |

|                                                       |                                                                                                                                                         |
|-------------------------------------------------------|---------------------------------------------------------------------------------------------------------------------------------------------------------|
| Specialty (status at time of registration)            | Description of specialty or subspecialty as per RCPSC or CFPC (for example, obstetrics and gynecology; cardiology; orthopedic surgery, Family Medicine) |
| Specialty (current status)                            | Description of specialty or subspecialty as per RCPSC or CFPC (for example, obstetrics and gynecology; cardiology; orthopedic surgery, Family Medicine) |
| Language of practice (status at time of registration) | Language in which member is competent to conduct practice (self-reported)                                                                               |

Abbreviations: CPSO (College of Physicians and Surgeons of Ontario); RCPSC (Royal College of Physicians and Surgeons of Canada); CFPC (College of Family Physicians Canada)



**Supplemental Table 2.** Datasets from CPSO and ICES for use in proposed research studies

| <b>Database</b>                                                                     | <b>Description</b>                                                                                                                                                                                  | <b>Data Elements</b>                                                                                                                                                                                                                    | <b>Available Range</b>               |
|-------------------------------------------------------------------------------------|-----------------------------------------------------------------------------------------------------------------------------------------------------------------------------------------------------|-----------------------------------------------------------------------------------------------------------------------------------------------------------------------------------------------------------------------------------------|--------------------------------------|
| College of Physicians and Surgeons of Ontario (CPSO)                                | Information about all physicians who initially registered for a license to practice medicine in Ontario.                                                                                            | Physician identifiers (encrypted), gender, date of initial registration, registration status, registration class, medical school, graduation year, practice information, specialty, language of practice                                | January 1, 1990 – November 26, 2018. |
| Ontario Health Insurance Plan (OHIP) Claims Database                                | Includes most claims paid by OHIP to physicians, groups, and laboratories from July 1991.                                                                                                           | Physician and patient identifiers (encrypted), codes for services provided, date of service, associated diagnosis, fee paid                                                                                                             | July 1991 – February 2020            |
| Canadian Institute for Health Information (CIHI) Discharge Abstract Databases (DAD) | Contains patient-level data for acute, rehab, chronic and day surgery institutions in Ontario. Also contains information on patient co-morbidities at the time of admission. Includes ICD-10 codes. | Patient demographics (sex, date of birth, postal code, county/residence), clinical information (diagnoses, procedures, physicians), administrative data (institution number, admission category, length of stay, discharge disposition) | April 1988 – December 2019           |
| CIHI Same Day Surgery Database (SDS)                                                | Contains information on same-day surgical procedures.                                                                                                                                               | Institution, procedures                                                                                                                                                                                                                 | April 1991 – March 2019              |
| CIHI National Ambulatory Care Reporting System (NACRS)                              | Captures information of patient visits to hospital and community-based ambulatory care, including day surgery, outpatient clinics, and emergency department from July 2000 onwards.                 | Emergency room visits                                                                                                                                                                                                                   | July 2000 – March 2019               |
| Ontario Mental Health Reporting System (OMHRS)                                      | Data on patients in adult designated inpatient mental health beds.                                                                                                                                  | Admission histories, reason for admission, psychiatric diagnoses                                                                                                                                                                        | October 2005 – March 2019            |

|                                                |                                                                                                                                                                                                                                                                                                               |                                                                                                                                                   |                              |
|------------------------------------------------|---------------------------------------------------------------------------------------------------------------------------------------------------------------------------------------------------------------------------------------------------------------------------------------------------------------|---------------------------------------------------------------------------------------------------------------------------------------------------|------------------------------|
| Client Agency Program Enrolment (CAPE)         | Data on the enrolment of patients in a primary care program with a specific practitioner or group. Obtained from the Ministry of Health and Long-Term Care.                                                                                                                                                   | Ascertainment of practice model for family physicians                                                                                             | March 1999 – Feb 2020        |
| Ontario Laboratories Information System (OLIS) | Information on laboratory tests ordered by providers, including patient information and test results.                                                                                                                                                                                                         | Patient demographics, provider information, specimen information, and results of laboratory tests                                                 | January 2007 – December 2017 |
| ICES Physicians Database (IPDB)                | Includes information from the Ontario Health Insurance Plan (OHIP) Corporate Provider Database (CPDB), the Ontario Physician Human Resource Data Centre (OPHRDC) database and the OHIP database of physician billings. It contains yearly information about all physicians in Ontario on a fiscal-year basis. | Physician demographics (age, sex); specialty; location; measures of physician activity (billings, workload, types or services provided)           | January 1992 – December 2017 |
| Registered Persons Database (RPDB)             | A vital statistics registry; provides basic demographic information about anyone who has ever received an Ontario health card number. Data supplied by the Ontario Ministry and enriched with information from other ICES in-house datasets. April 1990 onwards.                                              | Date of birth, sex, date of death, date of last contact, best known postal code, health care eligibility                                          | April 1991 – January 2020    |
| Ontario Census Area Profiles (CENSUS)          | Information on constituent income and other demographic information, collected by Statistics Canada.                                                                                                                                                                                                          | Income quintile                                                                                                                                   | Up to 2016                   |
| Local Health Integration Network (LHIN)        | Fourteen geographic areas within Ontario within which residents receive most of their hospital care from local hospitals.                                                                                                                                                                                     | LHIN number, name, population, localization index, number of high-volume hospitals, list of high-volume hospitals (names and institution numbers) | Up to 2009                   |

|                                                                                                               |                                                                                                                                                                                                                                               |                                                                                                                                                                                                                                                                      |                              |
|---------------------------------------------------------------------------------------------------------------|-----------------------------------------------------------------------------------------------------------------------------------------------------------------------------------------------------------------------------------------------|----------------------------------------------------------------------------------------------------------------------------------------------------------------------------------------------------------------------------------------------------------------------|------------------------------|
| Information about Ontario health care institutions funded by the Ministry of Health and Long-Term Care (INST) | Contains information about Ontario health care institutions funded by the Ministry of Health and Long-Term Care.                                                                                                                              | Hospital information                                                                                                                                                                                                                                                 | April 1987-December 2017     |
| Ontario Mother-Baby Linked Database (MOMBABY)                                                                 | Data on all inpatient admission records to mothers and their newborns delivered since 1988.                                                                                                                                                   | Perinatal health information, pregnancy information (includes stillbirths, terminations, live births)                                                                                                                                                                | April 1988 – March 2019      |
| Ontario Marginalization Index (ONMARG)                                                                        | Assesses socioeconomic vulnerability based on place of residence.                                                                                                                                                                             | Residential instability, material deprivation, dependency and ethnic concentration                                                                                                                                                                                   | Up to 2016                   |
| Ontario Hypertension Database (HYPER)                                                                         | ICES-derived cohort. Contains information on individuals diagnosed with hypertension.                                                                                                                                                         | Diagnosis of hypertension                                                                                                                                                                                                                                            | April 1991 – March 2019      |
| Ontario Diabetes Database (ODD)                                                                               | ICES-derived cohort. Contains information on individuals being treated for diabetes.                                                                                                                                                          | Diagnosis of diabetes                                                                                                                                                                                                                                                | April 1991 – March 2019      |
| Office of the Registrar General – Deaths (ORGD)                                                               | A vital statistics registry for death and cause of death.                                                                                                                                                                                     | Date and cause of death                                                                                                                                                                                                                                              | January 1990 – December 2017 |
| Immigration, Refugees and Citizenship Canada (IRCC)'s Permanent Resident Database (CIC)                       | Contains landing records for every permanent legal immigrant to Canada from 1985-2012.                                                                                                                                                        | Date of landing, immigration class<br>Canadian language ability, level of education                                                                                                                                                                                  | January 1985-May 2017        |
| Better Outcomes Registry and Network (BORN)                                                                   | Detailed variables on all Ontario hospital births over 20 weeks' gestational age. Data from fertility clinics, specialized antenatal clinics, prenatal screening laboratories, midwifery practice groups, and newborn screening laboratories. | Pregnancy: Antenatal provider, corticosteroid use, maternal body mass index, first trimester visit, flu-like illness in pregnancy, multiple gestation, health problems, prior obstetrical history, smoking, reproductive assistance, screening labs, fetal anomalies | April 2006 – March 2014      |

1  
2  
3  
4  
5  
6  
7  
8  
9  
10  
11  
12  
13  
14  
15  
16  
17  
18  
19  
20  
21  
22  
23  
24  
25  
26  
27  
28  
29  
30  
31  
32  
33  
34  
35  
36  
37  
38  
39  
40  
41  
42  
43  
44  
45  
46  
47

|  |  |                                                                                                                                                                                                                                                                                                                                                                                                                                                                                                                                               |  |
|--|--|-----------------------------------------------------------------------------------------------------------------------------------------------------------------------------------------------------------------------------------------------------------------------------------------------------------------------------------------------------------------------------------------------------------------------------------------------------------------------------------------------------------------------------------------------|--|
|  |  | <p>Delivery: Mode/assistance, labour augmentation, Caesarean section indication, gestational age at birth, indication &amp; method of induction, institution, fetal surveillance, labour type, maternal pain management, laceration, episiotomy, intrapartum complications)</p> <p>Baby: Large for gestational age, APGAR scores, cord pH, date of birth, sex, birthweight, linkage information, date of discharge or transfer, neonatal death, newborn resuscitation, reason for neonatal transfer</p> <p>Postpartum: Breastfeeding data</p> |  |
|--|--|-----------------------------------------------------------------------------------------------------------------------------------------------------------------------------------------------------------------------------------------------------------------------------------------------------------------------------------------------------------------------------------------------------------------------------------------------------------------------------------------------------------------------------------------------|--|

For peer review only

**Supplemental Table 3.** Perinatal and maternal adverse pregnancy outcomes

| Outcome                            | Definition                                                                   | Source           | Codes                                                                                                                                                              |
|------------------------------------|------------------------------------------------------------------------------|------------------|--------------------------------------------------------------------------------------------------------------------------------------------------------------------|
| <b>Perinatal</b>                   |                                                                              |                  |                                                                                                                                                                    |
| Preterm birth                      | Livebirth from 23-36 weeks GA                                                | MOMBABY          | M_STILLBIRTH=F<br>23 <= B_GESTWKS_DEL <= 36<br>(if missing use M_GESTWKS_DEL)                                                                                      |
| Extreme preterm birth              | Livebirth at 23-31 weeks GA                                                  | MOMBABY          | M_STILLBIRTH=F<br>23 <= B_GESTWKS_DEL <= 31<br>(if missing use M_GESTWKS_DEL)                                                                                      |
| Small for gestational age          | Birthweight <10 <sup>th</sup> percentile for sex and gestational age         | MOMBABY          | B_WEIGHT <10th percentile for B_SEX and B_GESTWKS_DEL (if missing use M_GESTWKS_DEL)                                                                               |
| Severe small for gestational age   | Birthweight <5 <sup>th</sup> percentile for sex and gestational age          | MOMBABY          | B_WEIGHT <5th percentile for B_SEX and B_GESTWKS_DEL (if missing use M_GESTWKS_DEL)                                                                                |
| NICU admission                     | Admission to neonatal intensive care for newborn on delivery admission       | CIHI-DAD         | SCU                                                                                                                                                                |
| Stillbirth                         | Stillbirth at ≥20 weeks GA                                                   | MOMBABY          | M_STILLBIRTH=T                                                                                                                                                     |
| Neonatal death                     | Death of infant less than from birth until 28 days postpartum                | MOMBABY          | DTHDATE within 28 days of index date                                                                                                                               |
| <b>Maternal</b>                    |                                                                              |                  |                                                                                                                                                                    |
| Severe maternal morbidity          | Composite endpoint of severe maternal complications                          | CIHI-DAD         | See Ray et al., 2018: (48)                                                                                                                                         |
| Hypertensive disorder of pregnancy | Composite endpoint of gestational hypertension, pre-eclampsia, and eclampsia | CIHI-DAD<br>OHIP | Gestational hypertension: ICD9: 642.0, 642.3, 642.9; ICD10: O13, O16<br>Pre-eclampsia/eclampsia: ICD9: 642.4, 642.5, 642.6, 642.7; ICD10: O11, O14, O15; OHIP: 642 |

|                                        |                                                                                                |                   |                                                                            |
|----------------------------------------|------------------------------------------------------------------------------------------------|-------------------|----------------------------------------------------------------------------|
| Preterm premature rupture of membranes | Defined as rupture of membranes prior to 37 weeks GA                                           | CIHI-DAD, MOMBABY | ICD9: 658.1, 658.2 + MOM_GESTWKS_ADM<37<br>ICD10: O42 + MOM_GESTWKS_ADM<37 |
| Preterm labour without preterm birth   | Hospital visit or admission for threatened preterm labour but with delivery $\geq$ 37 weeks GA | CIHI-DAD, NACRS   | ICD9: 644.0, 644.1<br>ICD10: O60.0                                         |
| Maternal death                         | Death of mother from 20 weeks GA until 42 days postpartum                                      | RPDB              | DTHDATE from date of 20 weeks GA to date of 42 weeks postpartum            |

Abbreviations: GA (gestational age); MOMBABY (ICES-derived Mother Baby Linked Dataset); CIHI (Canadian Institute of Health Information); DAD (Discharge Abstract Database); OHIP (Ontario Health Insurance Plan); ICD (International Classification of Disease); NA (not applicable)

# BMJ Open

## Reproductive patterns, pregnancy outcomes, and parental leave practices of women physicians in Ontario, Canada: the Dr. Mom Cohort Study protocol

|                                 |                                                                                                                                                                                                                                                                                                                                                                                                                                                                                                           |
|---------------------------------|-----------------------------------------------------------------------------------------------------------------------------------------------------------------------------------------------------------------------------------------------------------------------------------------------------------------------------------------------------------------------------------------------------------------------------------------------------------------------------------------------------------|
| Journal:                        | <i>BMJ Open</i>                                                                                                                                                                                                                                                                                                                                                                                                                                                                                           |
| Manuscript ID                   | bmjopen-2020-041281.R1                                                                                                                                                                                                                                                                                                                                                                                                                                                                                    |
| Article Type:                   | Protocol                                                                                                                                                                                                                                                                                                                                                                                                                                                                                                  |
| Date Submitted by the Author:   | 18-Aug-2020                                                                                                                                                                                                                                                                                                                                                                                                                                                                                               |
| Complete List of Authors:       | Cusimano, Maria; University of Toronto, Obstetrics & Gynaecology<br>Baxter, Nancy; The University of Melbourne School of Population and Global Health<br>Sutradhar, Rinku; Institute for Clinical Evaluative Sciences,<br>Ray, Joel; St Michael's Hospital<br>Garg, Amit; University of Western Ontario<br>McArthur, Eric; Institute for Clinical Evaluative Sciences<br>Vigod, Simone; University of Toronto,<br>Simpson, Andrea; St Michael's Hospital; University of Toronto, Obstetrics & Gynaecology |
| <b>Primary Subject Heading</b>: | Obstetrics and gynaecology                                                                                                                                                                                                                                                                                                                                                                                                                                                                                |
| Secondary Subject Heading:      | General practice / Family practice, Surgery, Epidemiology                                                                                                                                                                                                                                                                                                                                                                                                                                                 |
| Keywords:                       | EPIDEMIOLOGY, OBSTETRICS, Maternal medicine < OBSTETRICS, GENERAL MEDICINE (see Internal Medicine), MEDICAL EDUCATION & TRAINING, SURGERY                                                                                                                                                                                                                                                                                                                                                                 |
|                                 |                                                                                                                                                                                                                                                                                                                                                                                                                                                                                                           |

SCHOLARONE™  
Manuscripts



I, the Submitting Author has the right to grant and does grant on behalf of all authors of the Work (as defined in the below author licence), an exclusive licence and/or a non-exclusive licence for contributions from authors who are: i) UK Crown employees; ii) where BMJ has agreed a CC-BY licence shall apply, and/or iii) in accordance with the terms applicable for US Federal Government officers or employees acting as part of their official duties; on a worldwide, perpetual, irrevocable, royalty-free basis to BMJ Publishing Group Ltd ("BMJ") its licensees and where the relevant Journal is co-owned by BMJ to the co-owners of the Journal, to publish the Work in this journal and any other BMJ products and to exploit all rights, as set out in our [licence](#).

The Submitting Author accepts and understands that any supply made under these terms is made by BMJ to the Submitting Author unless you are acting as an employee on behalf of your employer or a postgraduate student of an affiliated institution which is paying any applicable article publishing charge ("APC") for Open Access articles. Where the Submitting Author wishes to make the Work available on an Open Access basis (and intends to pay the relevant APC), the terms of reuse of such Open Access shall be governed by a Creative Commons licence – details of these licences and which [Creative Commons](#) licence will apply to this Work are set out in our licence referred to above.

Other than as permitted in any relevant BMJ Author's Self Archiving Policies, I confirm this Work has not been accepted for publication elsewhere, is not being considered for publication elsewhere and does not duplicate material already published. I confirm all authors consent to publication of this Work and authorise the granting of this licence.



1  
2  
3 **1 Reproductive patterns, pregnancy outcomes, and parental leave practices of women**  
4  
5 **2 physicians in Ontario, Canada: the Dr. Mom Cohort Study protocol**  
6

7  
8 3 Maria C. Cusimano, MD<sup>1,2</sup>; Nancy N. Baxter, MD PhD<sup>2-4</sup>; Rinku Sutradhar, PhD<sup>4,5</sup>; Joel G. Ray,  
9  
10 4 MD MSc<sup>4,6</sup>; Amit X. Garg MD PhD<sup>4,7</sup>; Eric McArthur, MSc<sup>4</sup>; Simone Vigod, MD MSc<sup>4,8,9</sup>;  
11  
12 5 Andrea N. Simpson, MD MSc<sup>1,2,10</sup>  
13

14  
15  
16  
17 **7 Author Affiliations**  
18

- 19 8 [1] Department of Obstetrics & Gynaecology, University of Toronto, Toronto, ON, Canada  
20  
21 9 [2] Li Ka Shing Knowledge Institute, St. Michael's Hospital, Toronto, ON, Canada  
22  
23 10 [3] Melbourne School of Population and Global Health, University of Melbourne, Melbourne  
24  
25 11 VIC, Australia  
26  
27 12 [4] ICES (formerly the Institute for Clinical Evaluative Sciences), ON, Canada  
28  
29 13 [5] Division of Biostatistics, Dalla Lana School of Public Health, University of Toronto,  
30  
31 14 Toronto, ON, Canada  
32  
33 15 [6] Department of Medicine, St. Michael's Hospital, Toronto, ON, Canada  
34  
35 16 [7] Department of Medicine, London Health Sciences Centre, London, ON, Canada  
36  
37 17 [8] Department of Psychiatry, Women's College Hospital, Toronto, ON, Canada  
38  
39 18 [9] Women's College Research Institute, Women's College Hospital, Toronto, ON, Canada  
40  
41 19 [10] Department of Obstetrics & Gynaecology, St. Michael's Hospital/Unity Health Toronto,  
42  
43 20 Toronto, ON, Canada  
44  
45  
46  
47  
48

49  
50  
51 **22 Corresponding Author:** Dr. Andrea N. Simpson | 507-55 Queen St E, Toronto, Ontario, M5C  
52  
53 23 1R6 | T: (416) 867-7480 | <Andrea.Simpson@unityhealth.to>  
54  
55  
56  
57  
58  
59  
60

1  
2  
3  
4  
5  
6  
7  
8  
9  
10  
11  
12  
13  
14  
15  
16  
17  
18  
19  
20  
21  
22  
23  
24  
25  
26  
27  
28  
29  
30  
31  
32  
33  
34  
35  
36  
37  
38  
39  
40  
41  
42  
43  
44  
45  
46  
47  
48  
49  
50  
51  
52  
53  
54  
55  
56  
57  
58  
59  
60

24 **Keywords:** Epidemiology; Obstetrics; Maternal Medicine; General Medicine; Medical

25 Education & Training; Surgery

26

27 **Word Count:** Abstract 252; Body 4,062

28

For peer review only

1  
2  
3 **29 ABSTRACT**  
4  
5

6 **30 Introduction:** Surveys and qualitative studies suggest that women physicians may delay  
7  
8 **31** childbearing, be at increased risk of adverse peripartum complications when they do become  
9  
10 **32** pregnant, and face discrimination and lower earnings as a result of parenthood. Observational  
11  
12 **33** studies enrolling large, representative samples of women physicians are needed to accurately  
13  
14 **34** evaluate their reproductive patterns, pregnancy outcomes, parental leave practices, and  
15  
16 **35** earnings. This protocol provides a detailed research plan for such studies.  
17  
18  
19

20 **36 Methods & Analysis:** The Dr. Mom Cohort Study encompasses a series of retrospective  
21  
22 **37** observational studies of women physicians in Ontario, Canada. All practicing physicians in  
23  
24 **38** Ontario are registered with the College of Physicians and Surgeons of Ontario (CPSO). By  
25  
26 **39** linking a dataset of physicians from the CPSO to existing provincial administrative databases,  
27  
28 **40** which hold health data and physician billing records, we will be able to retrospectively assess the  
29  
30 **41** healthcare utilization, work practices, and pregnancy outcomes of women physicians at the  
31  
32 **42** population-level. Specific outcomes of interest include: (1) rates and timing of pregnancy; (2)  
33  
34 **43** pregnancy-related care and complications; and (3) duration of parental leave and subsequent  
35  
36 **44** earnings, each of which will be evaluated with regression methods appropriate to the form of the  
37  
38 **45** outcome. We estimate that, at minimum, 5,000 women physicians will be eligible for inclusion.  
39  
40  
41  
42  
43

44 **46 Ethics & Dissemination:** This protocol has been approved by the Research Ethics Board at St.  
45  
46 **47** Michael's Hospital in Toronto, Ontario, Canada (#18-248). We will disseminate findings through  
47  
48 **48** several peer-reviewed publications, presentations at national and international meetings, and  
49  
50 **49** engagement of physicians, residency programs, department heads, and medical societies.  
51  
52  
53  
54  
55  
56  
57  
58  
59  
60

## 50 STRENGTHS & LIMITATIONS OF THIS STUDY

- 51 • The observational studies proposed will be the largest to date of women physicians who  
52 have experienced pregnancy and childbirth.
- 53 • Linkage of the physician cohort to population-based administrative health databases will  
54 enable accurate ascertainment of occupational factors such as work intensity that may be  
55 associated with pregnancy outcomes.
- 56 • Due to the inherent limitations of such databases, we will be unable to account for  
57 sociodemographic factors such as relationship status and specific intentions with respect  
58 to pregnancy, family planning, and work leave practices. We will also be unable to  
59 determine the education level or occupation of non-physician controls.
- 60 • This study will be conducted in Ontario, Canada, and may not be generalizable to  
61 jurisdictions with major differences in medical training.

## 63 INTRODUCTION

64 Despite a marked increase in the number of women entering medicine over the last  
65 50 years (1, 2), the challenges associated with becoming pregnant and having children during  
66 training or clinical practice have been minimally addressed (3). Evidence from qualitative studies  
67 and surveys of women physicians raise concerns that pregnancy and motherhood may jeopardize  
68 career advancement, reduce job and fellowship opportunities, negatively impact referral patterns,  
69 and result in resentment from colleagues who may feel hampered with a greater workload (3-10).  
70 Inconsistent institutional support for pregnant women and parents, and the reality that physician  
71 mothers usually bear a disproportionate burden of home and parenting obligations compared to  
72 physician fathers, may exacerbate these problems (11-16). In part because of these issues, it is  
73 thought that women physicians may delay childbearing to more advanced maternal ages, or  
74 have fewer or no children more often than non-physician women in the general population  
75 (3, 17-22). However, epidemiologic studies investigating such hypotheses are lacking.

76 Once pregnant, the demands faced by physicians may predispose them to an increased  
77 risk of adverse outcomes. Prolonged hours, shift/night work, and exposure to infectious agents  
78 and radiation have been described as potential risk factors for pregnancy complications (23-26).  
79 Advanced maternal age, due to delayed childbearing, is associated with subfertility as well as  
80 increased risks of pregnancy complications including hypertensive disorders, fetal growth  
81 restriction, placental abruption, preterm delivery, and stillbirth, among others (27).

82 Existing studies comparing pregnancy outcomes in physicians and non-physicians are  
83 almost exclusively survey-based and findings vary widely (Table 1). Some studies demonstrate  
84 that physicians have increased risks of certain adverse pregnancy outcomes, such as hypertensive  
85 disorders and threatened preterm labour (28-33), while others find no such relationship (34, 35).

1  
2  
3 86 In the only registry-based study published to date, physician occupation was not associated with  
4  
5 87 preterm labour, low birth weight, or perinatal death compared to women with other white-collar  
6  
7 88 jobs, but differences across specialties, trainee status, or work intensity were not investigated  
8  
9  
10 89 (35). Since an association between the nature of physicians' work and adverse pregnancy  
11  
12 90 outcomes is biologically plausible, additional high-quality studies are needed.

13  
14 91 Women physicians face many challenges after pregnancy, and the literature is limited  
15  
16 92 in this area as well. Although many cross-sectional surveys have identified barriers to obtaining  
17  
18 93 adequate maternity leave and managing clinical loads around delivery and return to work (5, 12,  
19  
20 94 36-38), few studies have systematically described the practice patterns of physician mothers (16).  
21  
22 95 The impact of childbirth and parental leave on the subsequent earnings of women physicians is  
23  
24 96 also unclear. In one survey, over half of physician mothers reported losing \$10,000 or more in  
25  
26 97 income due to leave (7). In other fields, a motherhood earnings penalty beyond the gender pay  
27  
28 98 gap has been noted (39, 40). Although qualitative studies and surveys have underscored a  
29  
30 99 possibly similar phenomenon in physicians (5-7), observational research is required.

31  
32  
33  
34  
35 100

### 36 37 101 **SPECIFIC AIMS**

38  
39 102 In the proposed studies, we will harness unique data resources available in Ontario,  
40  
41 103 Canada, to address unanswered questions in this field. We will first develop a cohort of all  
42  
43 104 physicians who registered to practice in Ontario from 1990 to 2018 by linking physician  
44  
45 105 registration data to existing provincial health administrative data. We will then conduct  
46  
47 106 retrospective analyses within specific subgroups of this larger cohort and a representative sample  
48  
49 107 of non-physicians (Figure 1) to address the following objectives:  
50  
51  
52  
53  
54  
55  
56  
57  
58  
59  
60

- 1  
2  
3 108 1) Compare reproductive patterns between women physicians and non-physicians, and  
4  
5 109 determine if physician work characteristics are associated with rates of pregnancy  
6  
7  
8 110 2) Compare maternal outcomes, perinatal outcomes, and processes of obstetrical care  
9  
10 111 between women physicians and non-physicians, and determine if physician work  
11  
12 112 characteristics are associated with adverse pregnancy outcomes  
13  
14  
15 113 3) Describe the pregnancy and postpartum work practices of women physicians who  
16  
17 114 experience childbirth, and determine the impact of childbirth on practice patterns and  
18  
19 115 earnings relative to men physicians and women physicians who do not experience  
20  
21 116 childbirth  
22  
23  
24 117

## 26 118 **METHODS & ANALYSIS**

### 28 119 **Cohort development**

#### 30 120 *Rationale & Overview*

32  
33 121 Existing studies examining issues around pregnancy in physicians are almost entirely  
34  
35 122 self-report surveys with moderate response rates and small sample sizes, susceptible to selection  
36  
37 123 and misclassification bias. We will address this limitation by developing and retrospectively  
38  
39 124 studying a cohort of practicing physicians who registered with the College of Physicians and  
40  
41 125 Surgeons of Ontario (CPSO) from 1990 to 2018, linked to existing Ontario population-based  
42  
43 126 administrative databases.  
44  
45  
46  
47 127

#### 49 128 *Data Sources*

##### 51 129 *CPSO Database*

52  
53  
54  
55  
56  
57  
58  
59  
60

1  
2  
3 130 The CPSO is the body that regulates the practice of medicine in Ontario. Physicians are  
4  
5 131 required to be members of the CPSO to practice medicine in the province. The CPSO also has a  
6  
7  
8 132 legislated mandate to continuously improve the quality of care provided by physicians, by  
9  
10 133 maintaining standards of medical practice through peer assessment and remediation.

11  
12 134 To do this, the CPSO maintains a database of all physicians who have registered to  
13  
14 135 practice medicine in Ontario. We obtained a dataset of physicians who registered with the CPSO  
15  
16 136 from January 1, 1990 to November 26, 2018 (Supplemental Table 1). This dataset has variables  
17  
18 137 on physicians' registration status, medical school, year of graduation, practice location, and  
19  
20 138 specialty, collected at one or two possible time points: (1) the date of physicians' initial  
21  
22 139 registration, and/or (2) the most recent data query.

23  
24  
25  
26 140 Physicians of all age and genders in the CPSO dataset were probabilistically linked to  
27  
28 141 existing provincial administrative databases using physicians' given name, surname, gender, and  
29  
30 142 date of birth. Subsets of this larger linked cohort will be used to address each aim (Figure 1). The  
31  
32 143 linkage of the CPSO dataset to existing Ontario administrative databases enables assessment of  
33  
34 144 physicians' health service utilization and health outcomes.

#### 35 36 37 38 39 40 146 *Ontario Administrative Databases*

41  
42 147 All provincial administrative databases (Supplemental Table 2) required to establish the  
43  
44 148 cohorts, exposures, outcomes, and covariates specific to each aim are held at ICES, a non-profit  
45  
46 149 research institute authorized to collect and use health data on Ontario residents for the purposes  
47  
48 150 of health system evaluation and improvement. Collection and compilation of health records at  
49  
50 151 ICES is possible because Ontario residents have universal access to physician services and  
51  
52  
53  
54  
55  
56  
57  
58  
59  
60



1  
2  
3 152 hospital-based care through the Ontario Health Insurance Plan (OHIP). ICES databases  
4  
5 153 are linked using unique OHIP numbers that are assigned to each individual.  
6

7  
8 154 Demographic data will be identified from several ICES databases. Vital statistics and  
9  
10 155 postal code of residence, used to derive rurality and area-level income quintile from Canadian  
11  
12 156 census data, will be obtained from the Registered Persons Database (RPDB). Immigration status  
13  
14 157 will be obtained from the Ontario portion of Immigration, Refugees, and Citizenship Canada's  
15  
16 158 Permanent Resident Database. Marginalization, another area-level measure of socioeconomic  
17  
18 159 status based on residential instability, material deprivation, dependency, and ethnic  
19  
20 160 concentration, will be obtained from the Ontario Marginalization Index.  
21  
22

23  
24 161 Comorbidities will be ascertained from the Canadian Institute for Health Information  
25  
26 162 (CIHI) Discharge Abstract Database (DAD), which holds diagnostic/procedural information on  
27  
28 163 inpatient hospital stays since 1988; the Same Day Surgery (SDS) database, which holds records  
29  
30 164 for same day procedures since 1991; the National Ambulatory Care Reporting System (NACRS),  
31  
32 165 which holds records on emergency department visits since 2000; and the OHIP database, which  
33  
34 166 holds physician billing claims for health services since 1991. Several Ontario-specific registries  
35  
36 167 and ICES-derived cohorts, including the Ontario Cancer Registry, Ontario Diabetes Dataset,  
37  
38 168 and Ontario Hypertension Dataset, can also be used identify specific medical conditions.  
39  
40

41  
42 169 Childbirths and other recognized pregnancies (e.g. spontaneous abortions, ectopic  
43  
44 170 pregnancies) will be identified from the ICES-derived Mother-Baby Dataset (MOMBABY),  
45  
46 171 which links the CIHI records of delivering mothers and their newborns; the Better Outcomes  
47  
48 172 Registry and Network (BORN), Ontario's perinatal registry including data from fertility clinics,  
49  
50 173 specialized antenatal clinics, hospitals, midwifery practice groups, and both prenatal & newborn  
51  
52 174 screening laboratories; as well as the DAD, SDS, OHIP, and NACRS databases (Supplemental  
53  
54  
55  
56  
57  
58  
59  
60

1  
2  
3 175 Table 2-3). Adverse pregnancy-related and mental health outcomes will be obtained from these  
4  
5 176 same databases and as the Ontario Mental Health Reporting System (OMHRS) database, which  
6  
7 177 holds data on patients in adult designated inpatient mental health beds. Prenatal, antepartum,  
8  
9  
10 178 intrapartum, and postpartum health service utilization, including assisted reproductive  
11  
12 179 technology, will be obtained from the OHIP, DAD/SDS, and BORN databases.  
13

14  
15 180 The work practices and earnings of Ontario physicians will be obtained from the OHIP  
16  
17 181 database; 95% of specialists and 50% of primary care physicians receive their income from fee-  
18  
19 182 for-service (FFS) billings, and all Ontario physicians are required to submit shadow billings for  
20  
21 183 non-FFS services. The frequency and timing of physicians' billing claims for health services and  
22  
23 184 surgical procedures will be used to establish measures of work intensity such as overnight work,  
24  
25 185 and evening and weekend shiftwork, before, during, and after pregnancy. Physician earnings will  
26  
27 186 be derived from total OHIP billings. Practice model for family physicians will be obtained from  
28  
29 187 the Client Agency Program Enrolment (CAPE) database. Specialty, trainee status, and practice  
30  
31 188 location, will be obtained from the CPSO dataset and the ICES-derived Physician Database  
32  
33 189 (IPDB), which contains updated yearly information about physicians in Ontario.  
34  
35  
36  
37

38 190

### 39 40 191 ***Study Populations & Exposure Assessment***

41  
42 192 Study populations will depend on the aim (Figure 1). Aim 1 will include Ontario  
43  
44 193 women of reproductive age (15-50 years). Aim 2 will include Ontario women of reproductive  
45  
46 194 age who have had at least one childbirth  $\geq 20$  weeks gestational age (GA). In both Aims 1 and 2,  
47  
48 195 physician occupation will be the main exposure of interest; we will compare all women  
49  
50 196 physicians (exposed) to a representative sample of non-physicians (comparator). Physicians will  
51  
52 197 be selected from the CPSO dataset. Non-physicians will be selected from the RPDB, and  
53  
54  
55  
56  
57  
58  
59

1  
2  
3 198 randomly assigned a simulated CPSO registration date based on the distribution of registration  
4  
5 199 dates in physicians.

6  
7  
8 200 Aim 3 will include women and men physicians of reproductive age. Childbirth  $\geq 20$   
9  
10 201 weeks GA will be the main exposure of interest; we will compare women physicians who have  
11  
12 202 had at least one childbirth (exposed) to: (1) women physicians who have had no childbirths, and  
13  
14  
15 203 (2) men physicians (comparator). Comparator physicians will be randomly assigned a simulated  
16  
17 204 date of childbirth based on the distribution of childbirth dates in women physicians.  
18

19 205

### 20 206 *Covariates*

21  
22  
23  
24 207 We will examine several covariates in physicians and non-physicians. Demographic  
25  
26 208 factors will include age, year of cohort entry, income quintile, and immigration status. Clinical  
27  
28 209 factors will include comorbidities, use of assisted reproductive technology, number of previous  
29  
30  
31 210 livebirths, and number of previous recognized pregnancies. We will group comorbidities into  
32  
33 211 Aggregated Diagnosis Groups (ADGs) on the basis of similarity, chronicity, disability, and  
34  
35 212 likelihood of requiring specialty care using the Johns Hopkins ACG® System (41).  
36

37  
38 213 We will also examine several covariates in physicians only. Trainee status, specialty,  
39  
40 214 practice model, practice location, and measures of work intensity (e.g. weekend and overnight  
41  
42 215 shifts, time spent operating) will be ascertained according to methodology described below and  
43  
44  
45 216 in previous work (42-44).  
46

47 217

### 48 218 *Anticipated Challenges & Mitigation Strategies*

#### 49 219 *Variable Follow-Up*

1  
2  
3 220 Physicians are a highly mobile population; 34% of Canadian medical graduates move  
4  
5 221 outside of their home province for residency training (45), and 30% of Canadian physicians in  
6  
7 222 independent practice obtained their medical degree internationally (1). We therefore anticipate  
8  
9  
10 223 that some physicians will have lived in Ontario for their entire reproductive lifespans (complete  
11  
12 224 look-back), while others may have left Ontario periodically or arrived for the first time after  
13  
14  
15 225 medical school graduation (incomplete look-back).

16  
17 226 Physicians with incomplete look-back prior to their CPSO registration may have  
18  
19 227 insufficient data available to obtain study variables that rely on a historical period, particularly  
20  
21 228 to ascertain previous pregnancies, thus introducing potential for misclassification. For example,  
22  
23 229 a 32-year-old American physician with one prior childbirth moving to Ontario to practice would  
24  
25  
26 230 have no record of that birth in ICES databases. To mitigate this, we will truncate the look-back  
27  
28 231 of non-physicians to mirror that of matched physicians so that they undergo an identical  
29  
30  
31 232 process of ascertaining covariates. This will facilitate appropriate comparison.

32  
33 233

#### 34 35 234 *Determining Transition to Independent Practice*

36  
37 235 The CPSO database contains one variable describing the type of license (e.g.  
38  
39 236 postgraduate education, independent practice, etc.) held by physicians at the time of their initial  
40  
41  
42 237 registration with the CPSO (Supplemental Table 1). Preliminary analyses demonstrate that 90%  
43  
44 238 of reproductive-age physicians first registered as residents/fellows on a postgraduate education  
45  
46  
47 239 license. However, the CPSO database does not hold information on license changes, or when  
48  
49 240 physicians transition from postgraduate education to independent practice.

50  
51 241 To mitigate this, we plan to use OHIP data to identify the transition from training to  
52  
53  
54 242 practice. Physicians with a postgraduate education license receive a salary from the provincial

1  
2  
3 243 Ministry of Health and Long-Term Care, while physicians with an independent practice license  
4  
5 244 receive an income by submitting billings to OHIP. We will use physicians' initiation of billings  
6  
7 245 in OHIP as indicator of their transition from training to practice.  
8  
9

10 246

### 11 12 247 *Determining Physician Specialty* 13

14  
15 248 The CPSO database contains two variables describing the specialty of physicians  
16  
17 249 (Supplemental Table 1): one is collected at initial registration with the CPSO, and the other is  
18  
19 250 collected at the most recent data query. Specialty is not formally assigned until after physicians  
20  
21 251 finish residency training and are certified for practice by either the Royal College of Physicians  
22  
23 252 and Surgeons of Canada or the College of Family Physicians of Canada, despite the fact that  
24  
25 253 they have been working in that specialty for several years.  
26  
27

28 254 We will therefore assign specialty from the CPSO database based on information  
29  
30 255 available at the time of either initial registration or the most recent data query. For physicians  
31  
32 256 lacking specialty information, we will use linkages to IPDB and OHIP. If specialty information  
33  
34 257 remains missing after searching all three data sources (CPSO, IPDB, OHIP) and the physician  
35  
36 258 was a recent graduate from medical school ( $\leq 5$  years), then such physicians be deemed active  
37  
38 259 residents with specialty not yet determined.  
39  
40  
41

42 260

### 43 44 261 *Use of Administrative Data Sources* 45

46  
47 262 Use of ICES administrative data enables access to a large population-based sample of  
48  
49 263 physicians and non-physicians, with comprehensive follow-up of all health encounters over the  
50  
51 264 reproductive lifespan. However, ICES administrative data lacks granular variables that would be  
52  
53 265 of interest in this study, such as relationship status and intentions with respect to family planning,  
54  
55  
56  
57  
58  
59  
60

1  
2  
3 266 and is susceptible to misclassification due to coding errors. We cannot account for unmeasured  
4  
5 267 variables; however, we can mitigate the possibility of information bias. We have purposefully  
6  
7  
8 268 selected main exposures, covariates, and outcomes that can be ascertained using established  
9  
10 269 methodology and/or Ontario-specific algorithms to ensure accuracy (46-54); and have  
11  
12 270 used databases that are validated (55, 56) or periodically re-abstracted (57).  
13  
14  
15 271

## 17 272 **Aim 1: Compare reproductive patterns in women physicians and non-physicians**

### 19 273 *Rationale & Overview*

21 274 Numerous survey-based studies suggest that women physicians frequently delay  
22  
23 275 childbearing and subsequently experience a higher rate of infertility compared to the general  
24  
25  
26 276 population (3, 17-20). This has been quantified in only one retrospective cohort study assessing  
27  
28 277 birth trends among Taiwanese female physicians (21), which demonstrated that maternal age at  
29  
30  
31 278 delivery was up to four years later in physicians than non-physicians. Further studies are needed  
32  
33 279 to characterize the timing and factors impacting pregnancy in physicians.  
34  
35  
36 280

### 38 281 *Analysis Plan*

40 282 We will retrospectively evaluate reproductive patterns among Ontario women physicians  
41  
42 283 and non-physicians of reproductive age (15-50 years). We will use MOMBABY to ascertain  
43  
44 284 childbirth, and NACRS, OHIP, and CIHI-DAD to identify other recognized pregnancies.  
45  
46  
47 285 Unmatched time-to-event analyses will be performed to compare rates of childbirth between  
48  
49 286 physicians and the general population, and matched or adjusted time-to-event analyses will be  
50  
51 287 used to evaluate the independent association of physician occupation with rates of childbirth. We  
52  
53  
54  
55  
56  
57  
58  
59  
60

1  
2  
3 288 will also examine secondary outcomes such as number of childbirths, number of recognized  
4  
5 289 pregnancies, and maternal age at childbirth, among physicians and non-physicians.  
6

7  
8 290 We also aim to determine whether specific work-related factors faced by physicians  
9  
10 291 impact their reproductive patterns and rates of childbirth. Adjusted time-to-event and Poisson  
11  
12 292 regression models will be constructed in women physicians only to evaluate whether variables  
13  
14 293 such as specialty, trainee status, and frequency of overnight work are associated rates of  
15  
16 294 childbirth and other secondary outcomes respectively.  
17  
18

19 295

## 21 296 **Aim 2: Compare adverse pregnancy outcomes in women physicians and non-physicians**

### 23 297 ***Rationale & Overview***

24  
25  
26 298 It is unclear how work as a physician impacts obstetrical outcomes. A recent systematic  
27  
28 299 review demonstrated that pregnant women who work shifts or longer hours have increased odds  
29  
30 300 of preterm birth and other adverse outcomes, but all included studies were at substantial risk of  
31  
32 301 bias, and only one pertained specifically to physicians (26). We will be able to reliably establish  
33  
34 302 work characteristics prior to and during pregnancy from OHIP, and thus provide unique insight  
35  
36 303 into the association between physician occupation and adverse pregnancy outcomes.  
37  
38  
39

40 304

### 42 305 ***Outcomes***

43  
44 306 We will retrospectively evaluate adverse pregnancy outcomes among Ontario women  
45  
46 307 physicians and non-physicians of reproductive age who have experienced at least one childbirth  
47  
48 308  $\geq 20$  weeks GA. All outcomes of interest were chosen for their clinical relevance and established  
49  
50 309 methodology for ascertainment from ICES databases such as MOMBABY, DAD, and OHIP,  
51  
52 310 using standard diagnostic and procedural codes (46-54) (Supplemental Table 3).  
53  
54  
55  
56  
57  
58  
59

1  
2  
3 311 Perinatal outcomes include: preterm birth (delivery at <37 weeks GA); low birthweight;  
4  
5 312 stillbirth; neonatal intensive care unit (NICU) admission; and neonatal death at <28 days of life.  
6  
7  
8 313 Maternal outcomes include: severe maternal morbidity (a composite endpoint of potentially life-  
9  
10 314 threatening complications occurring during the index pregnancy) (48); maternal death (from 20  
11  
12 315 weeks GA to  $\leq$ 42 days postpartum); new onset hypertensive disorders in the index pregnancy;  
13  
14 316 other obstetric (e.g. premature rupture of membranes) and non-obstetric complications (e.g.  
15  
16 317 peripartum mood disorders); and processes of obstetrical care (e.g. antenatal care, labour  
17  
18 318 induction, mode of delivery, epidural).

319

### 320 *Analysis Plan*

321 Unmatched logistic regression will be performed to compare each adverse pregnancy  
322 outcome specified above between physicians and the general population. Matched or adjusted  
323 logistic regression analyses, accounting for demographic and clinical covariates as described  
324 above, will be performed to isolate the independent association of physician occupation with  
325 adverse pregnancy outcomes. We also aim to determine whether specific work-related factors  
326 faced by physicians influence their pregnancy outcomes. Adjusted logistic regression models  
327 will be constructed in women physicians only to evaluate whether variables such as specialty,  
328 trainee status, and overnight work are associated with adverse pregnancy outcomes. For all  
329 analyses described, we will also consider use of log-binomial or modified Poisson  
330 regression models to determine risk ratios directly.

331

332 **Aim 3: Compare practice patterns and earnings of women physicians experiencing**  
333 **childbirth to non-parent physicians**



1  
2  
3 334 ***Rationale & Overview***  
4

5 335 Although the challenges faced by both medical trainees and practicing physicians in  
6  
7 336 obtaining parental leave have been documented in the literature (5, 12, 36-38), the actual work  
8  
9  
10 337 and leave practices and remuneration of physician mothers are unknown. This data would be of  
11  
12 338 importance to physicians practicing in Canada, as the majority are self-employed. We aim to  
13  
14 339 describe the parental leave patterns and earnings of Ontario physicians using a rigorous  
15  
16 340 observational design.  
17  
18

19 341

20  
21 342 ***Analysis Plan***  
22

23  
24 343 We will retrospectively evaluate practice patterns and earnings of men and women  
25  
26 344 physicians in Ontario of reproductive age. We will hard-match women physicians who have had  
27  
28 345 at least one childbirth to women physicians who have had no childbirths, and to men physicians,  
29  
30 346 on their specialty and year of graduation from medical school. Physicians who have delivered  
31  
32 347 will enter the study on their obstetrical delivery date, and physicians who have not delivered will  
33  
34 348 be assigned a corresponding referent date.  
35  
36

37  
38 349 In women physicians who have delivered, we will examine: (1) length of leave, defined  
39  
40 350 by the absence of OHIP billings adjacent to the delivery date; and (2) timing of leave, defined in  
41  
42 351 relation to the delivery date. In all physicians, we will examine: (1) work intensity, defined as  
43  
44 352 mentioned previously through evaluation of measures such as overnight call practices and  
45  
46 353 operating time; (4) earnings, as defined by OHIP billings.  
47  
48

49 354 We will compare earnings across three distinct 2-year periods: (1) pre-pregnancy, (2)  
50  
51 355 peripartum; and (3) post-pregnancy. We will first perform a within-patient analysis pertaining to  
52  
53 356 delivering women physicians only, in order to assess how their earnings vary with pregnancy and  
54  
55  
56  
57  
58  
59  
60

1  
2  
3 357 childbirth. Earnings from all three time periods will be compared using regression methods for  
4  
5 358 cost data (e.g. Poisson, negative binomial, gamma models); the specific model will be  
6  
7  
8 359 determined based on the distribution of earnings for the cohort.  
9

10 360 We will then perform a comparative analysis of (a) delivering women physicians to non-  
11  
12 361 delivering women physicians, and (b) delivering women physicians to men physicians. Earnings  
13  
14 362 from the pre-pregnancy and post-pregnancy time periods, or dummy time periods in controls,  
15  
16  
17 363 will again be evaluated with appropriate regression methods for cost data.  
18  
19  
20 364

### 21 365 **Sample Size and Power**

22  
23  
24 366 The CPSO dataset should have adequate power for all proposed analyses. To  
25  
26 367 demonstrate this, we have calculated the power of our study to find differences in adverse  
27  
28 368 pregnancy outcomes, specifically preterm birth, between women physicians and non-physicians  
29  
30 369 (Specific Aim 2). Preterm birth is a major determinant of neonatal morbidity/mortality, and has  
31  
32  
33 370 significant long-term health consequences. Even a small increased risk of preterm birth would  
34  
35  
36 371 be of importance to women physicians.

37  
38 372 If a conservative 5,000 physicians have at least one pregnancy during the study period,  
39  
40 373 are compared to at least 25,000 non-physicians, and we assume a baseline preterm birth rate of  
41  
42 374 7.7 per 100 births (58) and an alpha of 0.05, we will have 80% power to detect a relative risk of  
43  
44  
45 375 1.16 or greater, and 90% power to detect a relative risk of 1.19 or greater.  
46  
47 376

### 48 49 377 **Patient and Public Involvement**

50  
51  
52  
53  
54  
55  
56  
57  
58  
59  
60

1  
2  
3 378 The public were not involved in the design of this study. The proposed research questions  
4  
5 379 aim to address issues of importance to physician health; the study team accordingly includes  
6  
7  
8 380 women physicians and physician parents.  
9

10 381

## 11 382 **SIGNIFICANCE**

12  
13  
14 383 The linkage of physician information to population-based data on pregnancy presents a  
15  
16 384 unique opportunity to evaluate physicians' reproductive patterns and perinatal health outcomes  
17  
18 385 in a manner that addresses the limitations of previous studies. Ontario's fee-for-service system  
19  
20 386 allows accurate ascertainment of physician work intensity and other work-related factors that  
21  
22 387 may affect rates of reproduction and adverse pregnancy outcomes.  
23  
24  
25

26 388 This work is needed; reproductive patterns and childbearing have not been rigorously  
27  
28 389 studied in physicians, despite many barriers to pregnancy and risk factors for adverse outcomes  
29  
30 390 inherent in their work. We will determine if physicians are at increased risk of adverse pregnancy  
31  
32 391 outcomes compared to the general population, and clarify whether this risk is mediated by age or  
33  
34 392 other occupational hazards. Understanding issues around pregnancy and leave, which may affect  
35  
36 393 up to half of the physician workforce at some point during their careers, also has implications for  
37  
38 394 the functioning of the healthcare system.  
39  
40  
41

42 395

## 43 396 **ETHICS & DISSEMINATION**

44  
45  
46 397 This protocol was approved by the Research Ethics Board at St. Michael's Hospital  
47  
48 398 (#18-248) and by the ICES Privacy & Legal Office. ICES is a prescribed entity under section 45  
49  
50 399 of Ontario's Personal Health Information Protection Act. Section 45 authorizes ICES to collect  
51  
52 400 personal health information without consent for analyses related to the evaluation of, allocation  
53  
54  
55  
56  
57  
58  
59  
60

1  
2  
3 401 of resources to, or planning for all or part of the health system. In accordance with ICES policy,  
4  
5 402 we will suppress all cells with <6 individuals to prevent re-identification. All research outputs  
6  
7 403 related to this work will undergo a re-identification risk assessment prior to submission.  
8  
9

10 404 Translation of the findings of our study into practices and policies will require  
11  
12 405 engagement of physicians, physician leaders, and organizational bodies. The team of researchers  
13  
14 406 includes clinician-investigators in obstetrics, surgery, medicine, and psychiatry who will provide  
15  
16 407 important contextual information to the dissemination of our findings. We will engage bodies  
17  
18 408 such as the Society of Obstetricians and Gynaecologists of Canada (SOGC), the Canadian  
19  
20 409 Medical Association (CMA), and residency programs and department heads.  
21  
22  
23

24 410 We anticipate that our findings will be presented at local and national conferences, and  
25  
26 411 result in several peer-reviewed publications. All manuscripts will adhere to the Strengthening the  
27  
28 412 Reporting of Observational Studies in Epidemiology (STROBE) guidelines (Supplemental Table  
29  
30 413 4). Our findings should impact physicians, physicians-in-training, medical educators, residency  
31  
32 414 program directors, department chairs, and hospitals and organizations where physicians work.  
33  
34  
35

36 415

## 37 416 **ACKNOWLEDGEMENTS**

38  
39  
40 417 The authors thank Drs. Peter Tanuseputro, Dr. Manish Sood and Emily Rhodes, Research  
41  
42 418 Assistant in Clinical Epidemiology at the Ottawa Hospital Research Institute, for their assistance  
43  
44 419 with data acquisition.  
45  
46

47 420

## 48 49 421 **FUNDING STATEMENT**

50  
51 422 This study will be conducted with grant funding from Physicians' Services Incorporated  
52  
53 423 (PSI) Foundation. This study is also supported by ICES, which is funded by an annual grant from  
54  
55  
56  
57  
58  
59

1  
2  
3 424 the Ontario Ministry of Health and Long-Term Care (MOHLTC). The opinions, results, analytic  
4  
5 425 plans, and conclusions reported in this paper are those of the authors and are independent of the  
6  
7 426 funding sources. No endorsement by ICES or the Ontario MOHLTC is intended or should be  
8  
9 427 inferred. Dr. Maria Cusimano is supported by the American College of Surgeons Resident  
10  
11 428 Research Scholarship and the Canadian Institutes of Health Research (CIHR) Vanier  
12  
13 429 Canada Graduate Scholarship.  
14  
15  
16  
17  
18

### 19 431 **AUTHOR CONTRIBUTIONS**

20  
21 432 All authors (MCC, NNB, RS, JGR, AXG, EM, SV, and ANS) contributed to the design  
22  
23 433 of this study. NNB, AXG, and ANS participated in data acquisition. MCC, NNB, RS, JGR, EM,  
24  
25 434 and ANS developed the analytic plan. MCC, NNB, and ANS obtained ethics approval for this  
26  
27 435 work. MCC prepared the first draft of the manuscript. All authors contributed to and approved  
28  
29 436 the final version of the manuscript.  
30  
31  
32

### 33 437

### 35 438 **COMPETING INTERESTS STATEMENT**

36  
37 439 The authors have no conflicts of interest to disclose.  
38  
39  
40  
41  
42  
43  
44  
45  
46  
47  
48  
49  
50  
51  
52  
53  
54  
55  
56  
57  
58  
59  
60

## REFERENCES

1. CIHI. Physicians in Canada: Canadian Institute for Health Information; 2018 [Available from: <https://www.cihi.ca/en/physicians-in-canada>].
2. AAMC. Physician Specialty Data Report: Association of American Medical Colleges; 2018 [Available from: <https://www.aamc.org/download/492910/data/2018executivesummary.pdf>].
3. Turner PL, Lumpkins K, Gabre J, Lin MJ, Liu X, Terrin M. Pregnancy among women surgeons: trends over time. *Arch Surg*. 2012;147(5):474-9.
4. Tamburrino MB, Evans CL, Campbell NB, Franco KN, Jurs SG, Pentz JE. Physician pregnancy: male and female colleagues' attitudes. *J Am Med Womens Assoc* (1972). 1992;47(3):82-4.
5. Halley MC, Rustagi AS, Torres JS, Linos E, Plaut V, Mangurian C, et al. Physician mothers' experience of workplace discrimination: a qualitative analysis. *BMJ*. 2018;363:k4926.
6. Adesoye T, Mangurian C, Choo EK, Girgis C, Sabry-Elnaggar H, Linos E, et al. Perceived Discrimination Experienced by Physician Mothers and Desired Workplace Changes: A Cross-sectional Survey. *JAMA Intern Med*. 2017;177(7):1033-6.
7. Scully RE, Davids JS, Melnitchouk N. Impact of Procedural Specialty on Maternity Leave and Career Satisfaction Among Female Physicians. *Ann Surg*. 2017;266(2):210-7.
8. Krause ML, Elrashidi MY, Halvorsen AJ, McDonald FS, Oxentenko AS. Impact of Pregnancy and Gender on Internal Medicine Resident Evaluations: A Retrospective Cohort Study. *J Gen Intern Med*. 2017;32(6):648-53.
9. Kin C, Yang R, Desai P, Mueller C, Girod S. Female trainees believe that having children will negatively impact their careers: results of a quantitative survey of trainees at an academic medical center. *BMC Med Educ*. 2018;18(1):260.
10. Willett LL, Wellons MF, Hartig JR, Roenigk L, Panda M, Dearing AT, et al. Do women residents delay childbearing due to perceived career threats? *Acad Med*. 2010;85(4):640-6.
11. Humphries LS, Lyon S, Garza R, Butz DR, Lemelman B, Park JE. Parental leave policies in graduate medical education: A systematic review. *Am J Surg*. 2017;214(4):634-9.
12. Phillips SP, Richardson B, Lent B. Medical faculty's views and experiences of parental leave: a collaborative study by the Gender Issues Committee, Council of Ontario Faculties of Medicine. *J Am Med Womens Assoc* (1972). 2000;55(1):23-6.
13. MacVane CZ, Fix ML, Strout TD, Zimmerman KD, Bloch RB, Hein CL. Congratulations, You're Pregnant! Now About Your Shifts . . . : The State of Maternity Leave Attitudes and Culture in EM. *West J Emerg Med*. 2017;18(5):800-10.
14. Hutchinson AM, Anderson NS, 3rd, Gochnour GL, Stewart C. Pregnancy and childbirth during family medicine residency training. *Fam Med*. 2011;43(3):160-5.
15. Jolly S, Griffith KA, DeCastro R, Stewart A, Ubel P, Jagsi R. Gender differences in time spent on parenting and domestic responsibilities by high-achieving young physician-researchers. *Ann Intern Med*. 2014;160(5):344-53.
16. Ly DP, Seabury SA, Jena AB. Hours Worked Among US Dual Physician Couples With Children, 2000 to 2015. *JAMA Intern Med*. 2017;177(10):1524-5.
17. Aghajanova L, Hoffman J, Mok-Lin E, Herndon CN. Obstetrics and Gynecology Residency and Fertility Needs. *Reprod Sci*. 2017;24(3):428-34.

18. Troppmann KM, Palis BE, Goodnight JE, Jr., Ho HS, Troppmann C. Women surgeons in the new millennium. *Arch Surg.* 2009;144(7):635-42.
19. Stentz NC, Griffith KA, Perkins E, Jones RD, Jagsi R. Fertility and Childbearing Among American Female Physicians. *J Womens Health (Larchmt).* 2016;25(10):1059-65.
20. Bering J, Pflibsen L, Eno C, Radhakrishnan P. Deferred Personal Life Decisions of Women Physicians. *J Womens Health (Larchmt).* 2018;27(5):584-9.
21. Wang YJ, Chiang SC, Chen TJ, Chou LF, Hwang SJ, Liu JY. Birth Trends among Female Physicians in Taiwan: A Nationwide Survey from 1996 to 2013. *Int J Environ Res Public Health.* 2017;14(7).
22. Souza JP, Tuncalp O, Vogel JP, Bohren M, Widmer M, Oladapo OT, et al. Obstetric transition: the pathway towards ending preventable maternal deaths. *BJOG.* 2014;121 Suppl 1:1-4.
23. Katz VL, Miller NH, Bowes WA, Jr. Pregnancy complications of physicians. *West J Med.* 1988;149(6):704-7.
24. Palmer KT, Bonzini M, Harris EC, Linaker C, Bonde JP. Work activities and risk of prematurity, low birth weight and pre-eclampsia: an updated review with meta-analysis. *Occup Environ Med.* 2013;70(4):213-22.
25. Stocker LJ, Macklon NS, Cheong YC, Bewley SJ. Influence of shift work on early reproductive outcomes: a systematic review and meta-analysis. *Obstet Gynecol.* 2014;124(1):99-110.
26. Cai C, Vandermeer B, Khurana R, Nerenberg K, Featherstone R, Sebastiani M, et al. The impact of occupational shift work and working hours during pregnancy on health outcomes: a systematic review and meta-analysis. *Am J Obstet Gynecol.* 2019.
27. Lean SC, Derricott H, Jones RL, Heazell AEP. Advanced maternal age and adverse pregnancy outcomes: A systematic review and meta-analysis. *PLoS One.* 2017;12(10):e0186287.
28. Klebanoff MA, Shiono PH, Rhoads GG. Outcomes of pregnancy in a national sample of resident physicians. *N Engl J Med.* 1990;323(15):1040-5.
29. Osborn LM, Harris DL, Reading JC, Prather MB. Outcome of pregnancies experienced during residency. *J Fam Pract.* 1990;31(6):618-22.
30. Pinhas-Hamiel O, Rotstein Z, Achiron A, Gabbay U, Achiron R, Barak Y, et al. Pregnancy during residency--an Israeli survey of women physicians. *Health Care Women Int.* 1999;20(1):63-70.
31. Gabbe SG, Morgan MA, Power ML, Schulkin J, Williams SB. Duty hours and pregnancy outcome among residents in obstetrics and gynecology. *Obstet Gynecol.* 2003;102(5 Pt 1):948-51.
32. Behbehani S, Tulandi T. Obstetrical complications in pregnant medical and surgical residents. *J Obstet Gynaecol Can.* 2015;37(1):25-31.
33. Miller NH, Katz VL, Cefalo RC. Pregnancies among physicians. A historical cohort study. *J Reprod Med.* 1989;34(10):790-6.
34. Heinonen S, Saarikoski S. Reproductive risk factors, pregnancy characteristics and obstetric outcome in female doctors. *BJOG.* 2002;109(3):261-4.
35. Quansah R, Gissler M, Jaakkola JJ. Work as a physician and adverse pregnancy outcomes: a Finnish nationwide population-based registry study. *Eur J Epidemiol.* 2009;24(9):531-6.

- 1
- 2
- 3 36. Rangel EL, Castillo-Angeles M, Changala M, Haider AH, Doherty GM, Smink DS. Perspectives of pregnancy and motherhood among general surgery residents: A qualitative analysis. *Am J Surg*. 2018;216(4):754-9.
- 4
- 5
- 6
- 7 37. Rangel EL, Smink DS, Castillo-Angeles M, Kwakye G, Changala M, Haider AH, et al. Pregnancy and Motherhood During Surgical Training. *JAMA Surg*. 2018;153(7):644-52.
- 8
- 9 38. Mohan H, Ali O, Gokani V, McGoldrick C, Smitham P, Fitzgerald JEF, et al. Surgical trainees' experience of pregnancy, maternity and paternity leave: a cross-sectional study. *Postgrad Med J*. 2019.
- 10
- 11
- 12 39. Budig MJ EP. The wage penalty for motherhood. *Am Sociol Rev*. 2001;66:204-25.
- 13 40. Budig MJ HM. Differences in disadvantage: Variation in the motherhood penalty across white women's earnings distribution. *Am Sociol Rev*. 2010;75:705-28.
- 14
- 15 41. Austin PC, van Walraven C, Wodchis WP, Newman A, Anderson GM. Using the Johns Hopkins Aggregated Diagnosis Groups (ADGs) to predict mortality in a general adult population cohort in Ontario, Canada. *Med Care*. 2011;49(10):932-9.
- 16
- 17 42. Govindarajan A, Urbach DR, Kumar M, Li Q, Murray BJ, Juurlink D, et al. Outcomes of Daytime Procedures Performed by Attending Surgeons after Night Work. *N Engl J Med*. 2015;373(9):845-53.
- 18
- 19 43. Redelmeier DA, Thiruchelvam D, Daneman N. Introducing a methodology for estimating duration of surgery in health services research. *J Clin Epidemiol*. 2008;61(9):882-9.
- 20 44. Dossa F, Simpson AN, Sutradhar R, Urbach DR, Tomlinson G, Detsky AS, et al. Sex-Based Disparities in the Hourly Earnings of Surgeons in the Fee-for-Service System in Ontario, Canada. *JAMA Surg*. 2019.
- 21 45. CaRMS. R-1 Data and Reports Ottawa, Ontario: Canadian Resident Matching Service; 2019 [Available from: <https://www.carms.ca/data-reports/r1-data-reports/>].
- 22 46. Ray JG, Vermeulen MJ, Schull MJ, Redelmeier DA. Cardiovascular health after maternal placental syndromes (CHAMPS): population-based retrospective cohort study. *Lancet*. 2005;366(9499):1797-803.
- 23 47. Joseph KS, Liu S, Rouleau J, Kirby RS, Kramer MS, Sauve R, et al. Severe maternal morbidity in Canada, 2003 to 2007: surveillance using routine hospitalization data and ICD-10CA codes. *J Obstet Gynaecol Can*. 2010;32(9):837-46.
- 24 48. Ray JG, Park AL, Dzakpasu S, Dayan N, Deb-Rinker P, Luo W, et al. Prevalence of Severe Maternal Morbidity and Factors Associated With Maternal Mortality in Ontario, Canada. *JAMA Netw Open*. 2018;1(7):e184571.
- 25 49. Garg AX, Nevis IF, McArthur E, Sontrop JM, Koval JJ, Lam NN, et al. Gestational hypertension and preeclampsia in living kidney donors. *N Engl J Med*. 2015;372(2):124-33.
- 26 50. Wanigaratne S, Shakya Y, Gagnon AJ, Cole DC, Rashid M, Blake J, et al. Refugee maternal and perinatal health in Ontario, Canada: a retrospective population-based study. *BMJ Open*. 2018;8(4):e018979.
- 27 51. Ray JG, Park AL, Fell DB. Mortality in Infants Affected by Preterm Birth and Severe Small-for-Gestational Age Birth Weight. *Pediatrics*. 2017;140(6).
- 28 52. Bartsch E, Park AL, Jairam J, Ray JG. Concomitant preterm birth and severe small-for-gestational age birth weight among infants of immigrant mothers in Ontario originating from the Philippines and East Asia: a population-based study. *BMJ Open*. 2017;7(7):e015386.
- 29 53. Polachek IS, Fung K, Vigod SN. First lifetime psychiatric admission in the postpartum period: A population-based comparison to women with prior psychiatric admission. *Gen Hosp Psychiatry*. 2016;40:25-32.
- 30
- 31
- 32
- 33
- 34
- 35
- 36
- 37
- 38
- 39
- 40
- 41
- 42
- 43
- 44
- 45
- 46
- 47
- 48
- 49
- 50
- 51
- 52
- 53
- 54
- 55
- 56
- 57
- 58
- 59
- 60



- 1  
2  
3 54. Barker LC, Kurdyak P, Fung K, Matheson FI, Vigod S. Postpartum psychiatric  
4 emergency visits: a nested case-control study. *Arch Womens Ment Health*. 2016;19(6):1019-27.  
5 55. Tu K, Campbell NR, Chen ZL, Cauch-Dudek KJ, McAlister FA. Accuracy of  
6 administrative databases in identifying patients with hypertension. *Open Med*. 2007;1(1):e18-26.  
7 56. Lipscombe LL, Hwee J, Webster L, Shah BR, Booth GL, Tu K. Identifying diabetes  
8 cases from administrative data: a population-based validation study. *BMC Health Serv Res*.  
9 2018;18(1):316.  
10 57. Juurlink D CR, Chong A, Austin P, Tu J, Laupacis A. Canadian Institute for Health  
11 Information Discharge Abstract Database: A Validation Study. 2006.  
12 58. Trends in Canadian births: 1993 to 2013: Statistics Canada; [Available from:  
13 <https://www150.statcan.gc.ca/n1/pub/82-625-x/2016001/article/14673-eng.htm>.  
14  
15  
16  
17  
18  
19  
20  
21  
22  
23  
24  
25  
26  
27  
28  
29  
30  
31  
32  
33  
34  
35  
36  
37  
38  
39  
40  
41  
42  
43  
44  
45  
46  
47  
48  
49  
50  
51  
52  
53  
54  
55  
56  
57  
58  
59  
60

**TABLES**

**Table 1.** Published studies of adverse pregnancy outcomes comparing physicians vs. non-physicians (1989 to 2019).

| Study                          | Region  | Exposed                   | Comparator                             | Response rate (%) | Relative direction of the outcome (exposed vs. comparator) |               |     |                |               |            |
|--------------------------------|---------|---------------------------|----------------------------------------|-------------------|------------------------------------------------------------|---------------|-----|----------------|---------------|------------|
|                                |         |                           |                                        |                   | SA                                                         | HTN disorders | SGA | Preterm labour | Preterm birth | Stillbirth |
| <b>Cross-sectional surveys</b> |         |                           |                                        |                   |                                                            |               |     |                |               |            |
| Klebanoff, 1990 (28)           | USA     | Women residents (N=989)   | Partners of male residents (N=1239)    | 86                | ↔                                                          | ↑             | ↔   | ↑              | ↔             | ↔          |
| Osborn, 1990 (29)              | USA     | Women residents (N=92)    | Partners of male residents (N=144)     | 57                | ↔                                                          | ↔             | NR  | ↑              | ↔             | ↔          |
| Pinhas-Hamiel, 1999 (30)       | Israel  | Women physicians (N=207)  | General population (NR)                | 52                | ↔                                                          | ↔             | NR  | NR             | ↑             | ↑          |
| Gabbe, 2003(31)                | USA     | Women residents (N=302)   | Partners of male residents (N=274)     | 96                | NR                                                         | ↑             | ↑   | ↑              | NR            | ↔          |
| Behbehani, 2015 (32)           | Canada  | Women residents (N=238)   | General population (N=3767)            | NR                | ↑                                                          | ↑             | ↑   | ↔              | NR            | NR         |
| <b>Cohort studies</b>          |         |                           |                                        |                   |                                                            |               |     |                |               |            |
| Miller, 1989 (33)              | USA     | Women physicians (N=67)   | General population (N=201)             | NA                | NR                                                         | NR            | NR  | ↑              | ↑             | NR         |
| Heinonen, 2002 (34)            | Finland | Women physicians (N=331)  | General population (N=21,997)          | NA                | NR                                                         | ↓             | ↔   | NR             | ↔             | ↔          |
| Quansah, 2009 (35)             | Finland | Women physicians (N=7642) | Upper white collar workers (N=124,606) | NA                | NR                                                         | NR            | ↔   | NR             | ↔             | ↔          |

Abbreviations: NA (not applicable); NR (not reported); SA (spontaneous abortion); HTN (hypertensive); SGA (small for gestational age birthweight); ↔ no significant difference; ↑ increased risk; ↓ decreased risk

1  
2  
3 **FIGURE LEGENDS**  
4  
5  
6  
7

8 **Figure 1.** Overview of specific research aims, with study populations (including exposed and  
9 comparator groups) and study outcomes.  
10  
11  
12  
13  
14  
15  
16  
17  
18  
19  
20  
21  
22  
23  
24  
25  
26  
27  
28  
29  
30  
31  
32  
33  
34  
35  
36  
37  
38  
39  
40  
41  
42  
43  
44  
45  
46  
47  
48  
49  
50  
51  
52  
53  
54  
55  
56  
57  
58  
59  
60

For peer review only

Figure 1

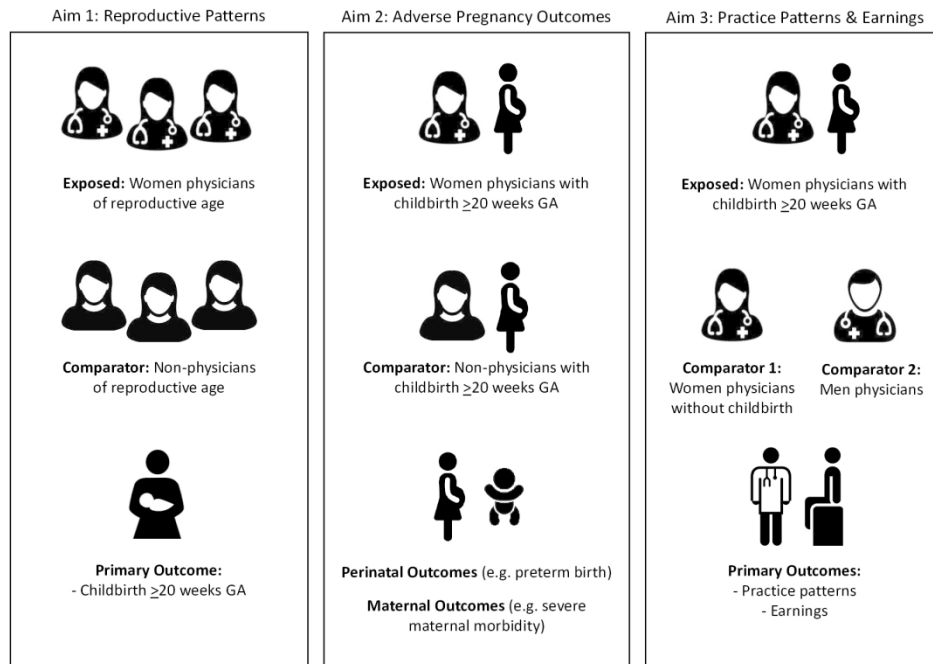

Figure 1. Overview of specific research aims, with study populations (including exposed and comparator groups) and study outcomes.

254x190mm (200 x 200 DPI)

1  
2  
3 **SUPPLEMENTAL INFORMATION**  
4  
5  
6

7  
8 **Supplemental Table 1.** Variable list from the College of Physicians & Surgeons of Ontario  
9

10  
11  
12 **Supplemental Table 2.** Datasets from CPSO and ICES for use in proposed research studies  
13  
14

15  
16  
17 **Supplemental Table 3.** Perinatal and maternal adverse pregnancy outcomes  
18  
19

20  
21 **Supplemental Table 4.** STROBE checklist for study  
22  
23  
24  
25  
26  
27  
28  
29  
30  
31  
32  
33  
34  
35  
36  
37  
38  
39  
40  
41  
42  
43  
44  
45  
46  
47  
48  
49  
50  
51  
52  
53  
54  
55  
56  
57  
58  
59  
60

**Supplemental Table 1.** Variable list from the College of Physicians & Surgeons of Ontario

| Reported Fields                                     | Field Description                                                                                                                                                                                                                                                                                                                                                                                                                                                                                                                                                                                                                                                                                                                                                                                                                                                                                                                                                                                                                                                                          |
|-----------------------------------------------------|--------------------------------------------------------------------------------------------------------------------------------------------------------------------------------------------------------------------------------------------------------------------------------------------------------------------------------------------------------------------------------------------------------------------------------------------------------------------------------------------------------------------------------------------------------------------------------------------------------------------------------------------------------------------------------------------------------------------------------------------------------------------------------------------------------------------------------------------------------------------------------------------------------------------------------------------------------------------------------------------------------------------------------------------------------------------------------------------|
| CPSO #                                              | CPSO license number and unique identifier                                                                                                                                                                                                                                                                                                                                                                                                                                                                                                                                                                                                                                                                                                                                                                                                                                                                                                                                                                                                                                                  |
| First name                                          | First and middle names                                                                                                                                                                                                                                                                                                                                                                                                                                                                                                                                                                                                                                                                                                                                                                                                                                                                                                                                                                                                                                                                     |
| Last name                                           | Surname                                                                                                                                                                                                                                                                                                                                                                                                                                                                                                                                                                                                                                                                                                                                                                                                                                                                                                                                                                                                                                                                                    |
| Gender                                              | Male or female designation provided by member upon application for license                                                                                                                                                                                                                                                                                                                                                                                                                                                                                                                                                                                                                                                                                                                                                                                                                                                                                                                                                                                                                 |
| Registration status (current status)                | Membership status with the CPSO (current as of query date): <ul style="list-style-type: none"> <li>i. Active</li> <li>ii. Expire</li> <li>iii. Suspended</li> <li>iv. Revoked</li> </ul>                                                                                                                                                                                                                                                                                                                                                                                                                                                                                                                                                                                                                                                                                                                                                                                                                                                                                                   |
| Registration class (status at time of registration) | Type of license member held at time of registration: <ul style="list-style-type: none"> <li>i. Independent Practice (IP) – Permits independent practice in the areas of medicine in which the physician is educated and experienced.</li> <li>ii. Postgraduate Education (PG) – Permits supervised practice after graduation from medical school, and is required for postgraduate (residency) medical training at an Ontario medical school.</li> <li>iii. Restricted (R) – Must practice in accordance with the specific terms and conditions imposed on the certificate.</li> <li>iv. Academic Practice (AP) – May practice only in the medical school department in which the physician holds an academic appointment.</li> <li>v. NOT INCLUDED: Academic Visitor (AV) – May practice only in the medical school department in which the physician holds an academic appointment.</li> <li>vi. NOT INCLUDED: Short Duration (SD) – May practice only to the extent required by the short duration appointment at a public hospital, psychiatric facility or medical school.</li> </ul> |
| First ever registration date                        | Date of initial registration with the CPSO (YYYYMMDD)                                                                                                                                                                                                                                                                                                                                                                                                                                                                                                                                                                                                                                                                                                                                                                                                                                                                                                                                                                                                                                      |
| Medical school                                      | School where member obtained undergraduate medical degree                                                                                                                                                                                                                                                                                                                                                                                                                                                                                                                                                                                                                                                                                                                                                                                                                                                                                                                                                                                                                                  |
| Graduation year                                     | Year the member graduated from undergraduate medical school                                                                                                                                                                                                                                                                                                                                                                                                                                                                                                                                                                                                                                                                                                                                                                                                                                                                                                                                                                                                                                |
| Practice address type                               | Self-reported information that describes either: <ul style="list-style-type: none"> <li>i. Primary Practice – Main practice location</li> <li>ii. Secondary Practice – Alternative practice location(s)</li> </ul>                                                                                                                                                                                                                                                                                                                                                                                                                                                                                                                                                                                                                                                                                                                                                                                                                                                                         |
| Practice address                                    | Member's primary and secondary practice addresses (first practice address available on file; if no address available, leave blank)                                                                                                                                                                                                                                                                                                                                                                                                                                                                                                                                                                                                                                                                                                                                                                                                                                                                                                                                                         |
| Practice city                                       | City or municipality of member's primary and secondary practice address                                                                                                                                                                                                                                                                                                                                                                                                                                                                                                                                                                                                                                                                                                                                                                                                                                                                                                                                                                                                                    |
| Practice province                                   | Province of member's primary and secondary practice addresses                                                                                                                                                                                                                                                                                                                                                                                                                                                                                                                                                                                                                                                                                                                                                                                                                                                                                                                                                                                                                              |
| Practice postal code                                | Postal code of member's primary and secondary practice addresses                                                                                                                                                                                                                                                                                                                                                                                                                                                                                                                                                                                                                                                                                                                                                                                                                                                                                                                                                                                                                           |
| Specialty type                                      | Specialty designation certified by one of the following: <ul style="list-style-type: none"> <li>i. Royal College of Physicians and Surgeons of Canada</li> <li>ii. College of Family Physicians Canada</li> <li>iii. College of Physicians and Surgeons of Ontario</li> </ul>                                                                                                                                                                                                                                                                                                                                                                                                                                                                                                                                                                                                                                                                                                                                                                                                              |

|                                                       |                                                                                                                                                         |
|-------------------------------------------------------|---------------------------------------------------------------------------------------------------------------------------------------------------------|
| Specialty (status at time of registration)            | Description of specialty or subspecialty as per RCPSC or CFPC (for example, obstetrics and gynecology; cardiology; orthopedic surgery, Family Medicine) |
| Specialty (current status)                            | Description of specialty or subspecialty as per RCPSC or CFPC (for example, obstetrics and gynecology; cardiology; orthopedic surgery, Family Medicine) |
| Language of practice (status at time of registration) | Language in which member is competent to conduct practice (self-reported)                                                                               |

Abbreviations: CPSO (College of Physicians and Surgeons of Ontario); RCPSC (Royal College of Physicians and Surgeons of Canada); CFPC (College of Family Physicians Canada)

**Supplemental Table 2.** Datasets from CPSO and ICES for use in proposed research studies

| <b>Database</b>                                                                     | <b>Description</b>                                                                                                                                                                                  | <b>Data Elements</b>                                                                                                                                                                                                                    | <b>Available Range</b>               |
|-------------------------------------------------------------------------------------|-----------------------------------------------------------------------------------------------------------------------------------------------------------------------------------------------------|-----------------------------------------------------------------------------------------------------------------------------------------------------------------------------------------------------------------------------------------|--------------------------------------|
| College of Physicians and Surgeons of Ontario (CPSO)                                | Information about all physicians who initially registered for a license to practice medicine in Ontario.                                                                                            | Physician identifiers (encrypted), gender, date of initial registration, registration status, registration class, medical school, graduation year, practice information, specialty, language of practice                                | January 1, 1990 – November 26, 2018. |
| Ontario Health Insurance Plan (OHIP) Claims Database                                | Includes most claims paid by OHIP to physicians, groups, and laboratories from July 1991.                                                                                                           | Physician and patient identifiers (encrypted), codes for services provided, date of service, associated diagnosis, fee paid                                                                                                             | July 1991 – February 2020            |
| Canadian Institute for Health Information (CIHI) Discharge Abstract Databases (DAD) | Contains patient-level data for acute, rehab, chronic and day surgery institutions in Ontario. Also contains information on patient co-morbidities at the time of admission. Includes ICD-10 codes. | Patient demographics (sex, date of birth, postal code, county/residence), clinical information (diagnoses, procedures, physicians), administrative data (institution number, admission category, length of stay, discharge disposition) | April 1988 – December 2019           |
| CIHI Same Day Surgery Database (SDS)                                                | Contains information on same-day surgical procedures.                                                                                                                                               | Institution, procedures                                                                                                                                                                                                                 | April 1991 – March 2019              |
| CIHI National Ambulatory Care Reporting System (NACRS)                              | Captures information of patient visits to hospital and community-based ambulatory care, including day surgery, outpatient clinics, and emergency department from July 2000 onwards.                 | Emergency room visits                                                                                                                                                                                                                   | July 2000 – March 2019               |
| Ontario Mental Health Reporting System (OMHRS)                                      | Data on patients in adult designated inpatient mental health beds.                                                                                                                                  | Admission histories, reason for admission, psychiatric diagnoses                                                                                                                                                                        | October 2005 – March 2019            |



|                                                |                                                                                                                                                                                                                                                                                                               |                                                                                                                                                   |                              |
|------------------------------------------------|---------------------------------------------------------------------------------------------------------------------------------------------------------------------------------------------------------------------------------------------------------------------------------------------------------------|---------------------------------------------------------------------------------------------------------------------------------------------------|------------------------------|
| Client Agency Program Enrolment (CAPE)         | Data on the enrolment of patients in a primary care program with a specific practitioner or group. Obtained from the Ministry of Health and Long-Term Care.                                                                                                                                                   | Ascertainment of practice model for family physicians                                                                                             | March 1999 – Feb 2020        |
| Ontario Laboratories Information System (OLIS) | Information on laboratory tests ordered by providers, including patient information and test results.                                                                                                                                                                                                         | Patient demographics, provider information, specimen information, and results of laboratory tests                                                 | January 2007 – December 2017 |
| ICES Physicians Database (IPDB)                | Includes information from the Ontario Health Insurance Plan (OHIP) Corporate Provider Database (CPDB), the Ontario Physician Human Resource Data Centre (OPHRDC) database and the OHIP database of physician billings. It contains yearly information about all physicians in Ontario on a fiscal-year basis. | Physician demographics (age, sex); specialty; location; measures of physician activity (billings, workload, types or services provided)           | January 1992 – December 2017 |
| Registered Persons Database (RPDB)             | A vital statistics registry; provides basic demographic information about anyone who has ever received an Ontario health card number. Data supplied by the Ontario Ministry and enriched with information from other ICES in-house datasets. April 1990 onwards.                                              | Date of birth, sex, date of death, date of last contact, best known postal code, health care eligibility                                          | April 1991 – January 2020    |
| Ontario Census Area Profiles (CENSUS)          | Information on constituent income and other demographic information, collected by Statistics Canada.                                                                                                                                                                                                          | Income quintile                                                                                                                                   | Up to 2016                   |
| Local Health Integration Network (LHIN)        | Fourteen geographic areas within Ontario within which residents receive most of their hospital care from local hospitals.                                                                                                                                                                                     | LHIN number, name, population, localization index, number of high-volume hospitals, list of high-volume hospitals (names and institution numbers) | Up to 2009                   |

|                                                                                                               |                                                                                                                                                                                                                                               |                                                                                                                                                                                                                                                                      |                              |
|---------------------------------------------------------------------------------------------------------------|-----------------------------------------------------------------------------------------------------------------------------------------------------------------------------------------------------------------------------------------------|----------------------------------------------------------------------------------------------------------------------------------------------------------------------------------------------------------------------------------------------------------------------|------------------------------|
| Information about Ontario health care institutions funded by the Ministry of Health and Long-Term Care (INST) | Contains information about Ontario health care institutions funded by the Ministry of Health and Long-Term Care.                                                                                                                              | Hospital information                                                                                                                                                                                                                                                 | April 1987-December 2017     |
| Ontario Mother-Baby Linked Database (MOMBABY)                                                                 | Data on all inpatient admission records to mothers and their newborns delivered since 1988.                                                                                                                                                   | Perinatal health information, pregnancy information (includes stillbirths, terminations, live births)                                                                                                                                                                | April 1988 – March 2019      |
| Ontario Marginalization Index (ONMARG)                                                                        | Assesses socioeconomic vulnerability based on place of residence.                                                                                                                                                                             | Residential instability, material deprivation, dependency and ethnic concentration                                                                                                                                                                                   | Up to 2016                   |
| Ontario Hypertension Database (HYPER)                                                                         | ICES-derived cohort. Contains information on individuals diagnosed with hypertension.                                                                                                                                                         | Diagnosis of hypertension                                                                                                                                                                                                                                            | April 1991 – March 2019      |
| Ontario Diabetes Database (ODD)                                                                               | ICES-derived cohort. Contains information on individuals being treated for diabetes.                                                                                                                                                          | Diagnosis of diabetes                                                                                                                                                                                                                                                | April 1991 – March 2019      |
| Office of the Registrar General – Deaths (ORGD)                                                               | A vital statistics registry for death and cause of death.                                                                                                                                                                                     | Date and cause of death                                                                                                                                                                                                                                              | January 1990 – December 2017 |
| Immigration, Refugees and Citizenship Canada (IRCC)'s Permanent Resident Database (CIC)                       | Contains landing records for every permanent legal immigrant to Canada from 1985-2012.                                                                                                                                                        | Date of landing, immigration class<br>Canadian language ability, level of education                                                                                                                                                                                  | January 1985-May 2017        |
| Better Outcomes Registry and Network (BORN)                                                                   | Detailed variables on all Ontario hospital births over 20 weeks' gestational age. Data from fertility clinics, specialized antenatal clinics, prenatal screening laboratories, midwifery practice groups, and newborn screening laboratories. | Pregnancy: Antenatal provider, corticosteroid use, maternal body mass index, first trimester visit, flu-like illness in pregnancy, multiple gestation, health problems, prior obstetrical history, smoking, reproductive assistance, screening labs, fetal anomalies | April 2006 – March 2014      |

1  
2  
3  
4  
5  
6  
7  
8  
9  
10  
11  
12  
13  
14  
15  
16  
17  
18  
19  
20  
21  
22  
23  
24  
25  
26  
27  
28  
29  
30  
31  
32  
33  
34  
35  
36  
37  
38  
39  
40  
41  
42  
43  
44  
45  
46  
47

|  |  |                                                                                                                                                                                                                                                                                                                                                                                                                                                                                                                                               |  |
|--|--|-----------------------------------------------------------------------------------------------------------------------------------------------------------------------------------------------------------------------------------------------------------------------------------------------------------------------------------------------------------------------------------------------------------------------------------------------------------------------------------------------------------------------------------------------|--|
|  |  | <p>Delivery: Mode/assistance, labour augmentation, Caesarean section indication, gestational age at birth, indication &amp; method of induction, institution, fetal surveillance, labour type, maternal pain management, laceration, episiotomy, intrapartum complications)</p> <p>Baby: Large for gestational age, APGAR scores, cord pH, date of birth, sex, birthweight, linkage information, date of discharge or transfer, neonatal death, newborn resuscitation, reason for neonatal transfer</p> <p>Postpartum: Breastfeeding data</p> |  |
|--|--|-----------------------------------------------------------------------------------------------------------------------------------------------------------------------------------------------------------------------------------------------------------------------------------------------------------------------------------------------------------------------------------------------------------------------------------------------------------------------------------------------------------------------------------------------|--|

For peer review only

**Supplemental Table 3.** Perinatal and maternal adverse pregnancy outcomes

| Outcome                            | Definition                                                                   | Source           | Codes                                                                                                                                                              |
|------------------------------------|------------------------------------------------------------------------------|------------------|--------------------------------------------------------------------------------------------------------------------------------------------------------------------|
| <b>Perinatal</b>                   |                                                                              |                  |                                                                                                                                                                    |
| Preterm birth                      | Livebirth from 23-36 weeks GA                                                | MOMBABY          | M_STILLBIRTH=F<br>23 <= B_GESTWKS_DEL <= 36<br>(if missing use M_GESTWKS_DEL)                                                                                      |
| Extreme preterm birth              | Livebirth at 23-31 weeks GA                                                  | MOMBABY          | M_STILLBIRTH=F<br>23 <= B_GESTWKS_DEL <= 31<br>(if missing use M_GESTWKS_DEL)                                                                                      |
| Small for gestational age          | Birthweight <10 <sup>th</sup> percentile for sex and gestational age         | MOMBABY          | B_WEIGHT <10th percentile for B_SEX and B_GESTWKS_DEL (if missing use M_GESTWKS_DEL)                                                                               |
| Severe small for gestational age   | Birthweight <5 <sup>th</sup> percentile for sex and gestational age          | MOMBABY          | B_WEIGHT <5th percentile for B_SEX and B_GESTWKS_DEL (if missing use M_GESTWKS_DEL)                                                                                |
| NICU admission                     | Admission to neonatal intensive care for newborn on delivery admission       | CIHI-DAD         | SCU                                                                                                                                                                |
| Stillbirth                         | Stillbirth at $\geq 20$ weeks GA                                             | MOMBABY          | M_STILLBIRTH=T                                                                                                                                                     |
| Neonatal death                     | Death of infant less than from birth until 28 days postpartum                | MOMBABY          | DTHDATE within 28 days of index date                                                                                                                               |
| <b>Maternal</b>                    |                                                                              |                  |                                                                                                                                                                    |
| Severe maternal morbidity          | Composite endpoint of severe maternal complications                          | CIHI-DAD         | See Ray et al., 2018: (48)                                                                                                                                         |
| Hypertensive disorder of pregnancy | Composite endpoint of gestational hypertension, pre-eclampsia, and eclampsia | CIHI-DAD<br>OHIP | Gestational hypertension: ICD9: 642.0, 642.3, 642.9; ICD10: O13, O16<br>Pre-eclampsia/eclampsia: ICD9: 642.4, 642.5, 642.6, 642.7; ICD10: O11, O14, O15; OHIP: 642 |

|                                        |                                                                                                |                   |                                                                            |
|----------------------------------------|------------------------------------------------------------------------------------------------|-------------------|----------------------------------------------------------------------------|
| Preterm premature rupture of membranes | Defined as rupture of membranes prior to 37 weeks GA                                           | CIHI-DAD, MOMBABY | ICD9: 658.1, 658.2 + MOM_GESTWKS_ADM<37<br>ICD10: O42 + MOM_GESTWKS_ADM<37 |
| Preterm labour without preterm birth   | Hospital visit or admission for threatened preterm labour but with delivery $\geq$ 37 weeks GA | CIHI-DAD, NACRS   | ICD9: 644.0, 644.1<br>ICD10: O60.0                                         |
| Maternal death                         | Death of mother from 20 weeks GA until 42 days postpartum                                      | RPDB              | DTHDATE from date of 20 weeks GA to date of 42 weeks postpartum            |

Abbreviations: GA (gestational age); MOMBABY (ICES-derived Mother Baby Linked Dataset); CIHI (Canadian Institute of Health Information); DAD (Discharge Abstract Database); OHIP (Ontario Health Insurance Plan); ICD (International Classification of Disease); NA (not applicable)

**Supplemental Table 4.** STROBE checklist for study

|                           | <b>Item No</b> | <b>Recommendation</b>                                                                                                                                                                | <b>Page Location</b> |
|---------------------------|----------------|--------------------------------------------------------------------------------------------------------------------------------------------------------------------------------------|----------------------|
| <b>Title and abstract</b> | 1              | (a) Indicate the study's design with a commonly used term in the title or the abstract                                                                                               | 1                    |
|                           |                | (b) Provide in the abstract an informative and balanced summary of what was done and what was found                                                                                  | 3                    |
| <b>Introduction</b>       |                |                                                                                                                                                                                      |                      |
| Background/rationale      | 2              | Explain the scientific background and rationale for the investigation being reported                                                                                                 | 5-6                  |
| Objectives                | 3              | State specific objectives, including any pre-specified hypotheses                                                                                                                    | 6-7                  |
| <b>Methods</b>            |                |                                                                                                                                                                                      |                      |
| Study design              | 4              | Present key elements of study design early in the paper                                                                                                                              | 7                    |
| Setting                   | 5              | Describe the setting, locations, and relevant dates, including periods of recruitment, exposure, follow-up, and data collection                                                      | 7-11                 |
| Participants              | 6              | (a) Give the eligibility criteria, and the sources and methods of selection of participants. Describe methods of follow-up                                                           | 10-11                |
|                           |                | (b) For matched studies, give matching criteria and number of exposed and unexposed                                                                                                  | 10-11                |
| Variables                 | 7              | Clearly define all outcomes, exposures, predictors, potential confounders, and effect modifiers. Give diagnostic criteria, if applicable                                             | 10-11, 14-18         |
| Data sources/measurement  | 8*             | For each variable of interest, give sources of data and details of methods of assessment (measurement). Describe comparability of assessment methods if there is more than one group | 7-14                 |
| Bias                      | 9              | Describe any efforts to address potential sources of bias                                                                                                                            | 4, 11-14             |
| Study size                | 10             | Explain how the study size was arrived at                                                                                                                                            | N/A                  |
| Quantitative variables    | 11             | Explain how quantitative variables were handled in the analyses. If applicable, describe which groupings were chosen and why                                                         | N/A                  |
| Statistical methods       | 12             | (a) Describe all statistical methods, including those used to control for confounding                                                                                                | 14-18                |
|                           |                | (b) Describe any methods used to examine subgroups and interactions                                                                                                                  | 14-18                |

|                   |     |                                                                                                                                                                                                                |          |
|-------------------|-----|----------------------------------------------------------------------------------------------------------------------------------------------------------------------------------------------------------------|----------|
|                   |     | (c) Explain how missing data were addressed                                                                                                                                                                    | 11-14    |
|                   |     | (d) If applicable, explain how loss to follow-up was addressed                                                                                                                                                 | 11       |
|                   |     | (e) Describe any sensitivity analyses                                                                                                                                                                          | N/A      |
| <b>Results</b>    |     |                                                                                                                                                                                                                |          |
| Participants      | 13* | (a) Report numbers of individuals at each stage of study—e.g. numbers potentially eligible, examined for eligibility, confirmed eligible, included in the study, completing follow-up, and analysed            | N/A      |
|                   |     | (b) Give reasons for non-participation at each stage                                                                                                                                                           | N/A      |
|                   |     | (c) Consider use of a flow diagram                                                                                                                                                                             | N/A      |
| Descriptive data  | 14* | (a) Give characteristics of study participants (e.g. demographic, clinical, social) and information on exposures and potential confounders                                                                     | N/A      |
|                   |     | (b) Indicate number of participants with missing data for each variable of interest                                                                                                                            | N/A      |
|                   |     | (c) Summarise follow-up time (e.g., average and total amount)                                                                                                                                                  | N/A      |
| Outcome data      | 15* | Report numbers of outcome events or summary measures over time                                                                                                                                                 | N/A      |
| Main results      | 16  | (a) Give unadjusted estimates and, if applicable, confounder-adjusted estimates and their precision (e.g., 95% confidence interval). Make clear which confounders were adjusted for and why they were included | N/A      |
|                   |     | (b) Report category boundaries when continuous variables were categorized                                                                                                                                      | N/A      |
|                   |     | (c) If relevant, consider translating estimates of relative risk into absolute risk for a meaningful time period                                                                                               | N/A      |
| Other analyses    | 17  | Report other analyses done—e.g. analyses of subgroups and interactions, and sensitivity analyses                                                                                                               | N/A      |
| <b>Discussion</b> |     |                                                                                                                                                                                                                |          |
| Key results       | 18  | Summarise key results with reference to study objectives                                                                                                                                                       | N/A      |
| Limitations       | 19  | Discuss limitations of the study, taking into account sources of potential bias or imprecision. Discuss both direction and magnitude of any potential bias                                                     | 4, 11-14 |
| Interpretation    | 20  | Give a cautious overall interpretation of results considering objectives, limitations, multiplicity of analyses, results from similar studies, and other relevant evidence                                     | N/A      |

1  
2  
3  
4  
5  
6  
7  
8  
9  
10  
11  
12  
13  
14  
15  
16  
17  
18  
19  
20  
21  
22  
23  
24  
25  
26  
27  
28  
29  
30  
31  
32  
33  
34  
35  
36  
37  
38  
39  
40  
41  
42  
43  
44  
45  
46  
47

|                          |    |                                                                                                                                                               |       |
|--------------------------|----|---------------------------------------------------------------------------------------------------------------------------------------------------------------|-------|
| Generalisability         | 21 | Discuss the generalisability (external validity) of the study results                                                                                         | N/A   |
| <b>Other information</b> |    |                                                                                                                                                               |       |
| Funding                  | 22 | Give the source of funding and the role of the funders for the present study and, if applicable, for the original study on which the present article is based | 20-21 |

\*Give information separately for exposed and unexposed groups.

**Note:** An Explanation and Elaboration article discusses each checklist item and gives methodological background and published examples of transparent reporting. The STROBE checklist is best used in conjunction with this article (freely available on the Web sites of PLoS Medicine at <http://www.plosmedicine.org/>, Annals of Internal Medicine at <http://www.annals.org/>, and Epidemiology at <http://www.epidem.com/>). Information on the STROBE Initiative is available at <http://www.strobe-statement.org>.
