# Supplementary material for: Reproductive patterns, pregnancy outcomes and parental leave practices of women physicians in Ontario, Canada: the Dr Mom Cohort Study protocol
Source: PubMed Central journal article supplement — BMJ Open. 2020 Oct 21;10(10):e041281. doi: 10.1136/bmjopen-2020-041281 (PMC7580071; doi:10.1136/bmjopen-2020-041281), 2020-10-21
Supplement: bmjopen-2020-041281supp001.pdf [file bmjopen-2020-041281supp001.pdf]

**Supplemental Table 1.** Variable list from the College of Physicians & Surgeons of Ontario

| <b>Reported Fields</b>                              | <b>Field Description</b>                                                                                                                                                                                                                                                                                                                                                                                                                                                                                                                                                                                                                                                                                                                                                                                                                                                                                                                                                                                                                                                                   |
|-----------------------------------------------------|--------------------------------------------------------------------------------------------------------------------------------------------------------------------------------------------------------------------------------------------------------------------------------------------------------------------------------------------------------------------------------------------------------------------------------------------------------------------------------------------------------------------------------------------------------------------------------------------------------------------------------------------------------------------------------------------------------------------------------------------------------------------------------------------------------------------------------------------------------------------------------------------------------------------------------------------------------------------------------------------------------------------------------------------------------------------------------------------|
| CPSO #                                              | CPSO license number and unique identifier                                                                                                                                                                                                                                                                                                                                                                                                                                                                                                                                                                                                                                                                                                                                                                                                                                                                                                                                                                                                                                                  |
| First name                                          | First and middle names                                                                                                                                                                                                                                                                                                                                                                                                                                                                                                                                                                                                                                                                                                                                                                                                                                                                                                                                                                                                                                                                     |
| Last name                                           | Surname                                                                                                                                                                                                                                                                                                                                                                                                                                                                                                                                                                                                                                                                                                                                                                                                                                                                                                                                                                                                                                                                                    |
| Gender                                              | Male or female designation provided by member upon application for license                                                                                                                                                                                                                                                                                                                                                                                                                                                                                                                                                                                                                                                                                                                                                                                                                                                                                                                                                                                                                 |
| Registration status (current status)                | Membership status with the CPSO (current as of query date): <ul style="list-style-type: none"> <li>i. Active</li> <li>ii. Expire</li> <li>iii. Suspended</li> <li>iv. Revoked</li> </ul>                                                                                                                                                                                                                                                                                                                                                                                                                                                                                                                                                                                                                                                                                                                                                                                                                                                                                                   |
| Registration class (status at time of registration) | Type of license member held at time of registration: <ul style="list-style-type: none"> <li>i. Independent Practice (IP) – Permits independent practice in the areas of medicine in which the physician is educated and experienced.</li> <li>ii. Postgraduate Education (PG) – Permits supervised practice after graduation from medical school, and is required for postgraduate (residency) medical training at an Ontario medical school.</li> <li>iii. Restricted (R) – Must practice in accordance with the specific terms and conditions imposed on the certificate.</li> <li>iv. Academic Practice (AP) – May practice only in the medical school department in which the physician holds an academic appointment.</li> <li>v. NOT INCLUDED: Academic Visitor (AV) – May practice only in the medical school department in which the physician holds an academic appointment.</li> <li>vi. NOT INCLUDED: Short Duration (SD) – May practice only to the extent required by the short duration appointment at a public hospital, psychiatric facility or medical school.</li> </ul> |
| First ever registration date                        | Date of initial registration with the CPSO (YYYYMMDD)                                                                                                                                                                                                                                                                                                                                                                                                                                                                                                                                                                                                                                                                                                                                                                                                                                                                                                                                                                                                                                      |
| Medical school                                      | School where member obtained undergraduate medical degree                                                                                                                                                                                                                                                                                                                                                                                                                                                                                                                                                                                                                                                                                                                                                                                                                                                                                                                                                                                                                                  |
| Graduation year                                     | Year the member graduated from undergraduate medical school                                                                                                                                                                                                                                                                                                                                                                                                                                                                                                                                                                                                                                                                                                                                                                                                                                                                                                                                                                                                                                |
| Practice address type                               | Self-reported information that describes either: <ul style="list-style-type: none"> <li>i. Primary Practice – Main practice location</li> <li>ii. Secondary Practice – Alternative practice location(s)</li> </ul>                                                                                                                                                                                                                                                                                                                                                                                                                                                                                                                                                                                                                                                                                                                                                                                                                                                                         |
| Practice address                                    | Member's primary and secondary practice addresses (first practice address available on file; if no address available, leave blank)                                                                                                                                                                                                                                                                                                                                                                                                                                                                                                                                                                                                                                                                                                                                                                                                                                                                                                                                                         |
| Practice city                                       | City or municipality of member's primary and secondary practice address                                                                                                                                                                                                                                                                                                                                                                                                                                                                                                                                                                                                                                                                                                                                                                                                                                                                                                                                                                                                                    |
| Practice province                                   | Province of member's primary and secondary practice addresses                                                                                                                                                                                                                                                                                                                                                                                                                                                                                                                                                                                                                                                                                                                                                                                                                                                                                                                                                                                                                              |
| Practice postal code                                | Postal code of member's primary and secondary practice addresses                                                                                                                                                                                                                                                                                                                                                                                                                                                                                                                                                                                                                                                                                                                                                                                                                                                                                                                                                                                                                           |
| Specialty type                                      | Specialty designation certified by one of the following: <ul style="list-style-type: none"> <li>i. Royal College of Physicians and Surgeons of Canada</li> <li>ii. College of Family Physicians Canada</li> <li>iii. College of Physicians and Surgeons of Ontario</li> </ul>                                                                                                                                                                                                                                                                                                                                                                                                                                                                                                                                                                                                                                                                                                                                                                                                              |

|                                                       |                                                                                                                                                         |
|-------------------------------------------------------|---------------------------------------------------------------------------------------------------------------------------------------------------------|
| Specialty (status at time of registration)            | Description of specialty or subspecialty as per RCPSC or CFPC (for example, obstetrics and gynecology; cardiology; orthopedic surgery, Family Medicine) |
| Specialty (current status)                            | Description of specialty or subspecialty as per RCPSC or CFPC (for example, obstetrics and gynecology; cardiology; orthopedic surgery, Family Medicine) |
| Language of practice (status at time of registration) | Language in which member is competent to conduct practice (self-reported)                                                                               |

Abbreviations: CPSO (College of Physicians and Surgeons of Ontario); RCPSC (Royal College of Physicians and Surgeons of Canada); CFPC (College of Family Physicians Canada)
