# Supplementary material for: Reproductive patterns, pregnancy outcomes and parental leave practices of women physicians in Ontario, Canada: the Dr Mom Cohort Study protocol
Source: PubMed Central journal article supplement — BMJ Open. 2020 Oct 21;10(10):e041281. doi: 10.1136/bmjopen-2020-041281 (PMC7580071; doi:10.1136/bmjopen-2020-041281), 2020-10-21
Supplement: bmjopen-2020-041281supp002.pdf [file bmjopen-2020-041281supp002.pdf]

**Supplemental Table 2.** Datasets from CPSO and ICES for use in proposed research studies

| <b>Database</b>                                                                     | <b>Description</b>                                                                                                                                                                                  | <b>Data Elements</b>                                                                                                                                                                                                                    | <b>Available Range</b>               |
|-------------------------------------------------------------------------------------|-----------------------------------------------------------------------------------------------------------------------------------------------------------------------------------------------------|-----------------------------------------------------------------------------------------------------------------------------------------------------------------------------------------------------------------------------------------|--------------------------------------|
| College of Physicians and Surgeons of Ontario (CPSO)                                | Information about all physicians who initially registered for a license to practice medicine in Ontario.                                                                                            | Physician identifiers (encrypted), gender, date of initial registration, registration status, registration class, medical school, graduation year, practice information, specialty, language of practice                                | January 1, 1990 – November 26, 2018. |
| Ontario Health Insurance Plan (OHIP) Claims Database                                | Includes most claims paid by OHIP to physicians, groups, and laboratories from July 1991.                                                                                                           | Physician and patient identifiers (encrypted), codes for services provided, date of service, associated diagnosis, fee paid                                                                                                             | July 1991 – February 2020            |
| Canadian Institute for Health Information (CIHI) Discharge Abstract Databases (DAD) | Contains patient-level data for acute, rehab, chronic and day surgery institutions in Ontario. Also contains information on patient co-morbidities at the time of admission. Includes ICD-10 codes. | Patient demographics (sex, date of birth, postal code, county/residence), clinical information (diagnoses, procedures, physicians), administrative data (institution number, admission category, length of stay, discharge disposition) | April 1988 – December 2019           |
| CIHI Same Day Surgery Database (SDS)                                                | Contains information on same-day surgical procedures.                                                                                                                                               | Institution, procedures                                                                                                                                                                                                                 | April 1991 – March 2019              |
| CIHI National Ambulatory Care Reporting System (NACRS)                              | Captures information of patient visits to hospital and community-based ambulatory care, including day surgery, outpatient clinics, and emergency department from July 2000 onwards.                 | Emergency room visits                                                                                                                                                                                                                   | July 2000 – March 2019               |
| Ontario Mental Health Reporting System (OMHRS)                                      | Data on patients in adult designated inpatient mental health beds.                                                                                                                                  | Admission histories, reason for admission, psychiatric diagnoses                                                                                                                                                                        | October 2005 – March 2019            |

|                                                |                                                                                                                                                                                                                                                                                                               |                                                                                                                                                   |                              |
|------------------------------------------------|---------------------------------------------------------------------------------------------------------------------------------------------------------------------------------------------------------------------------------------------------------------------------------------------------------------|---------------------------------------------------------------------------------------------------------------------------------------------------|------------------------------|
| Client Agency Program Enrolment (CAPE)         | Data on the enrolment of patients in a primary care program with a specific practitioner or group. Obtained from the Ministry of Health and Long-Term Care.                                                                                                                                                   | Ascertainment of practice model for family physicians                                                                                             | March 1999 – Feb 2020        |
| Ontario Laboratories Information System (OLIS) | Information on laboratory tests ordered by providers, including patient information and test results.                                                                                                                                                                                                         | Patient demographics, provider information, specimen information, and results of laboratory tests                                                 | January 2007 – December 2017 |
| ICES Physicians Database (IPDB)                | Includes information from the Ontario Health Insurance Plan (OHIP) Corporate Provider Database (CPDB), the Ontario Physician Human Resource Data Centre (OPHRDC) database and the OHIP database of physician billings. It contains yearly information about all physicians in Ontario on a fiscal-year basis. | Physician demographics (age, sex); specialty; location; measures of physician activity (billings, workload, types or services provided)           | January 1992 – December 2017 |
| Registered Persons Database (RPDB)             | A vital statistics registry; provides basic demographic information about anyone who has ever received an Ontario health card number. Data supplied by the Ontario Ministry and enriched with information from other ICES in-house datasets. April 1990 onwards.                                              | Date of birth, sex, date of death, date of last contact, best known postal code, health care eligibility                                          | April 1991 – January 2020    |
| Ontario Census Area Profiles (CENSUS)          | Information on constituent income and other demographic information, collected by Statistics Canada.                                                                                                                                                                                                          | Income quintile                                                                                                                                   | Up to 2016                   |
| Local Health Integration Network (LHIN)        | Fourteen geographic areas within Ontario within which residents receive most of their hospital care from local hospitals.                                                                                                                                                                                     | LHIN number, name, population, localization index, number of high-volume hospitals, list of high-volume hospitals (names and institution numbers) | Up to 2009                   |

|                                                                                                               |                                                                                                                                                                                                                                               |                                                                                                                                                                                                                                                                      |                              |
|---------------------------------------------------------------------------------------------------------------|-----------------------------------------------------------------------------------------------------------------------------------------------------------------------------------------------------------------------------------------------|----------------------------------------------------------------------------------------------------------------------------------------------------------------------------------------------------------------------------------------------------------------------|------------------------------|
| Information about Ontario health care institutions funded by the Ministry of Health and Long-Term Care (INST) | Contains information about Ontario health care institutions funded by the Ministry of Health and Long-Term Care.                                                                                                                              | Hospital information                                                                                                                                                                                                                                                 | April 1987-December 2017     |
| Ontario Mother-Baby Linked Database (MOMBABY)                                                                 | Data on all inpatient admission records to mothers and their newborns delivered since 1988.                                                                                                                                                   | Perinatal health information, pregnancy information (includes stillbirths, terminations, live births)                                                                                                                                                                | April 1988 – March 2019      |
| Ontario Marginalization Index (ONMARG)                                                                        | Assesses socioeconomic vulnerability based on place of residence.                                                                                                                                                                             | Residential instability, material deprivation, dependency and ethnic concentration                                                                                                                                                                                   | Up to 2016                   |
| Ontario Hypertension Database (HYPER)                                                                         | ICES-derived cohort. Contains information on individuals diagnosed with hypertension.                                                                                                                                                         | Diagnosis of hypertension                                                                                                                                                                                                                                            | April 1991 – March 2019      |
| Ontario Diabetes Database (ODD)                                                                               | ICES-derived cohort. Contains information on individuals being treated for diabetes.                                                                                                                                                          | Diagnosis of diabetes                                                                                                                                                                                                                                                | April 1991 – March 2019      |
| Office of the Registrar General – Deaths (ORGD)                                                               | A vital statistics registry for death and cause of death.                                                                                                                                                                                     | Date and cause of death                                                                                                                                                                                                                                              | January 1990 – December 2017 |
| Immigration, Refugees and Citizenship Canada (IRCC)'s Permanent Resident Database (CIC)                       | Contains landing records for every permanent legal immigrant to Canada from 1985-2012.                                                                                                                                                        | Date of landing, immigration class<br>Canadian language ability, level of education                                                                                                                                                                                  | January 1985-May 2017        |
| Better Outcomes Registry and Network (BORN)                                                                   | Detailed variables on all Ontario hospital births over 20 weeks' gestational age. Data from fertility clinics, specialized antenatal clinics, prenatal screening laboratories, midwifery practice groups, and newborn screening laboratories. | Pregnancy: Antenatal provider, corticosteroid use, maternal body mass index, first trimester visit, flu-like illness in pregnancy, multiple gestation, health problems, prior obstetrical history, smoking, reproductive assistance, screening labs, fetal anomalies | April 2006 – March 2014      |

|  |  |                                                                                                                                                                                                                                                                                                                                                                                                                                                                                                                                               |  |
|--|--|-----------------------------------------------------------------------------------------------------------------------------------------------------------------------------------------------------------------------------------------------------------------------------------------------------------------------------------------------------------------------------------------------------------------------------------------------------------------------------------------------------------------------------------------------|--|
|  |  | <p>Delivery: Mode/assistance, labour augmentation, Caesarean section indication, gestational age at birth, indication &amp; method of induction, institution, fetal surveillance, labour type, maternal pain management, laceration, episiotomy, intrapartum complications)</p> <p>Baby: Large for gestational age, APGAR scores, cord pH, date of birth, sex, birthweight, linkage information, date of discharge or transfer, neonatal death, newborn resuscitation, reason for neonatal transfer</p> <p>Postpartum: Breastfeeding data</p> |  |
|--|--|-----------------------------------------------------------------------------------------------------------------------------------------------------------------------------------------------------------------------------------------------------------------------------------------------------------------------------------------------------------------------------------------------------------------------------------------------------------------------------------------------------------------------------------------------|--|
