# Supplementary material for: Reproductive patterns, pregnancy outcomes and parental leave practices of women physicians in Ontario, Canada: the Dr Mom Cohort Study protocol
Source: PubMed Central journal article supplement — BMJ Open. 2020 Oct 21;10(10):e041281. doi: 10.1136/bmjopen-2020-041281 (PMC7580071; doi:10.1136/bmjopen-2020-041281), 2020-10-21
Supplement: bmjopen-2020-041281supp003.pdf [file bmjopen-2020-041281supp003.pdf]

**Supplemental Table 3.** Perinatal and maternal adverse pregnancy outcomes

| Outcome                            | Definition                                                                   | Source           | Codes                                                                                                                                                              |
|------------------------------------|------------------------------------------------------------------------------|------------------|--------------------------------------------------------------------------------------------------------------------------------------------------------------------|
| <b>Perinatal</b>                   |                                                                              |                  |                                                                                                                                                                    |
| Preterm birth                      | Livebirth from 23-36 weeks GA                                                | MOMBABY          | M_STILLBIRTH=F<br>23 <= B_GESTWKS_DEL <= 36<br>(if missing use M_GESTWKS_DEL)                                                                                      |
| Extreme preterm birth              | Livebirth at 23-31 weeks GA                                                  | MOMBABY          | M_STILLBIRTH=F<br>23 <= B_GESTWKS_DEL <= 31<br>(if missing use M_GESTWKS_DEL)                                                                                      |
| Small for gestational age          | Birthweight <10 <sup>th</sup> percentile for sex and gestational age         | MOMBABY          | B_WEIGHT <10th percentile for B_SEX and B_GESTWKS_DEL (if missing use M_GESTWKS_DEL)                                                                               |
| Severe small for gestational age   | Birthweight <5 <sup>th</sup> percentile for sex and gestational age          | MOMBABY          | B_WEIGHT <5th percentile for B_SEX and B_GESTWKS_DEL (if missing use M_GESTWKS_DEL)                                                                                |
| NICU admission                     | Admission to neonatal intensive care for newborn on delivery admission       | CIHI-DAD         | SCU                                                                                                                                                                |
| Stillbirth                         | Stillbirth at ≥20 weeks GA                                                   | MOMBABY          | M_STILLBIRTH=T                                                                                                                                                     |
| Neonatal death                     | Death of infant less than from birth until 28 days postpartum                | MOMBABY          | DTHDATE within 28 days of index date                                                                                                                               |
| <b>Maternal</b>                    |                                                                              |                  |                                                                                                                                                                    |
| Severe maternal morbidity          | Composite endpoint of severe maternal complications                          | CIHI-DAD         | See Ray et al., 2018: (48)                                                                                                                                         |
| Hypertensive disorder of pregnancy | Composite endpoint of gestational hypertension, pre-eclampsia, and eclampsia | CIHI-DAD<br>OHIP | Gestational hypertension: ICD9: 642.0, 642.3, 642.9; ICD10: O13, O16<br>Pre-eclampsia/eclampsia: ICD9: 642.4, 642.5, 642.6, 642.7; ICD10: O11, O14, O15; OHIP: 642 |

|                                        |                                                                                                |                   |                                                                            |
|----------------------------------------|------------------------------------------------------------------------------------------------|-------------------|----------------------------------------------------------------------------|
| Preterm premature rupture of membranes | Defined as rupture of membranes prior to 37 weeks GA                                           | CIHI-DAD, MOMBABY | ICD9: 658.1, 658.2 + MOM_GESTWKS_ADM<37<br>ICD10: O42 + MOM_GESTWKS_ADM<37 |
| Preterm labour without preterm birth   | Hospital visit or admission for threatened preterm labour but with delivery $\geq$ 37 weeks GA | CIHI-DAD, NACRS   | ICD9: 644.0, 644.1<br>ICD10: O60.0                                         |
| Maternal death                         | Death of mother from 20 weeks GA until 42 days postpartum                                      | RPDB              | DTHDATE from date of 20 weeks GA to date of 42 weeks postpartum            |

Abbreviations: GA (gestational age); MOMBABY (ICES-derived Mother Baby Linked Dataset); CIHI (Canadian Institute of Health Information); DAD (Discharge Abstract Database); OHIP (Ontario Health Insurance Plan); ICD (International Classification of Disease); NA (not applicable)
